# Supplementary material for: Insulin-like 3 affects zebrafish spermatogenic cells directly and via Sertoli cells
Source: PubMed Central journal article supplement (PMC7884674; doi:10.1038/s42003-021-01708-y), 2021-02-15
Supplement: 42003_2021_1708_MOESM1_ESM.pdf [file 42003_2021_1708_MOESM1_ESM.pdf]

## **Supplementary Information**

### **Insulin-like 3 affects zebrafish spermatogenic cells directly and via Sertoli cells**

Diego Crespo, Luiz H. C. Assis, Yu Ting Zhang, Diego Safian, Tomasz Furmanek, Kai Ove Skafnesmo, Birgitta Norberg, Wei Ge, Yung-Ching Choi, Marjo J. den Broeder, Juliette Legler, Jan Bogerd, Rüdiger W. Schulz

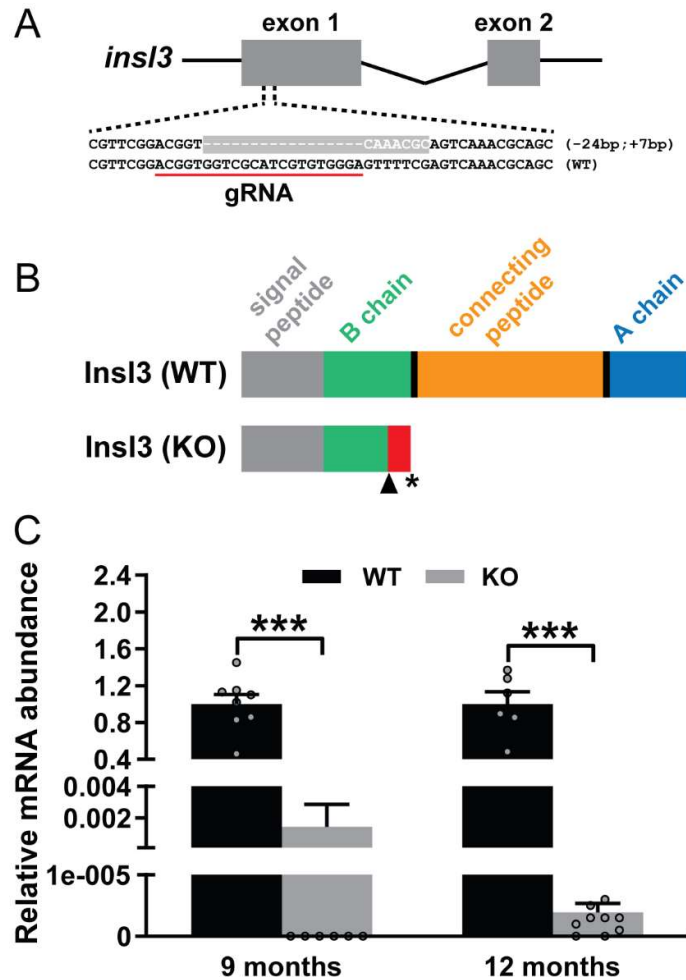

**Supplementary Fig. 1 Efficient disruption of zebrafish *insl3* by CRISPR/Cas9.** **a** Design of the guide RNA (gRNA) target site on exon 1 targeting the *insl3* gene (underlined sequence). Representative Sanger sequencing results showing the indels identified (highlighted with a grey background) in the *insl3* mutant line generated in this study. Numbers to the right of the mutant sequence indicate the loss or gain of bases, with the number of bases deleted (-) or inserted (+). WT, wild-type; bp, base pair. **b** Schematic diagram showing the functional domains of the WT InsI3 protein *versus* the *insl3* knockout (KO) mutant sequence. The black arrowhead indicates the start of the indel (the insertion indicated with the red box) and the asterisk indicates a premature stop codon caused by the frame shift. Black boxes in the InsI3 precursor indicate proteolytic processing sites. **c** CRISPR/Cas9-mediated decrease of *insl3* transcript levels in both 9 and 12 month-old zebrafish KO testes. Data are shown as mean fold change  $\pm$  SEM (WT and KO, 9 months: N = 8 and 7; WT and KO, 12 months: N = 6 and 10; \*\*\*,  $p < 0.001$ ) and expressed relative to the WT control group (which is set at 1).

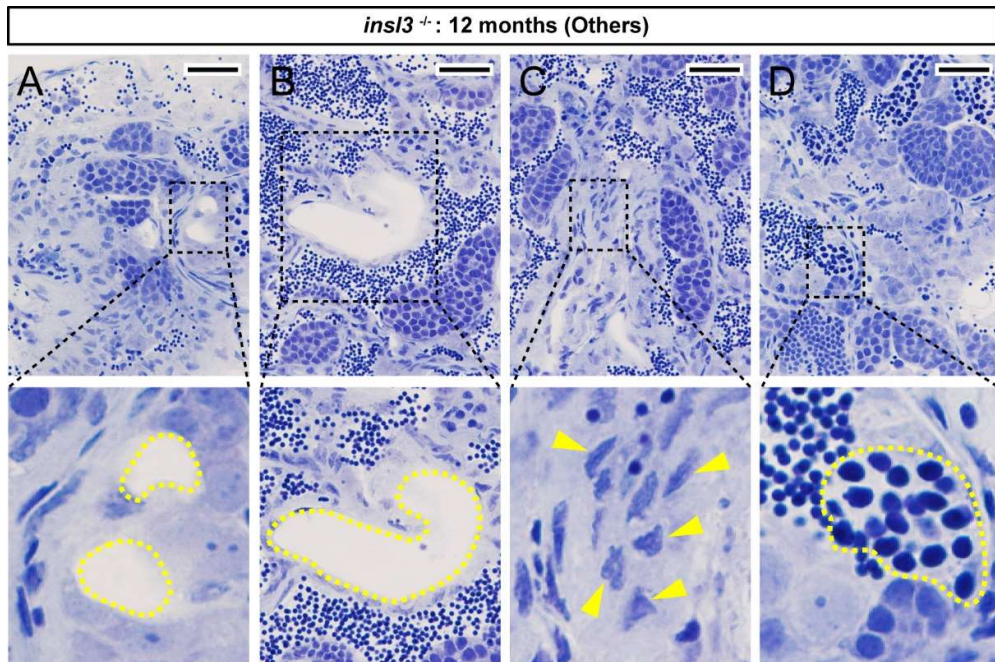

**Supplementary Fig. 2 Composition of the category "Others" shown in Fig. 2d.** **a-d** Areas found exclusively (**a-c**) or more prominently (**d**) in 12 months-old *insl3* knockout (*insl3*<sup>-/-</sup>) testes. **a** Empty areas adjacent to Sertoli and/or germ cells within the germinal epithelium. **b** Empty areas lined by cytoplasmic extensions of Sertoli cells within the germinal epithelium. **c** Areas containing an accumulation of Sertoli cells. **d** Areas containing apoptotic germ cells. The stippled black areas identify the magnified areas. The stippled yellow lines in **a** indicate empty space lined by germ and/or Sertoli cells, or lined only by Sertoli cell extensions in **b**, in both cases not forming part of the tubular lumen. Yellow arrowheads in **c** indicate areas showing an accumulation of only Sertoli cells. The yellow stippled line in **d** indicates a group of germ cells (type B spermatogonia) that show the typical appearance of apoptotic cells in toluidine-blue stained plastic sections (shrinkage, losing at least partially the contact with the immediate tissue environment, pyknosis/nuclear fragmentation<sup>3</sup>). Scale bars, 25  $\mu$ m.

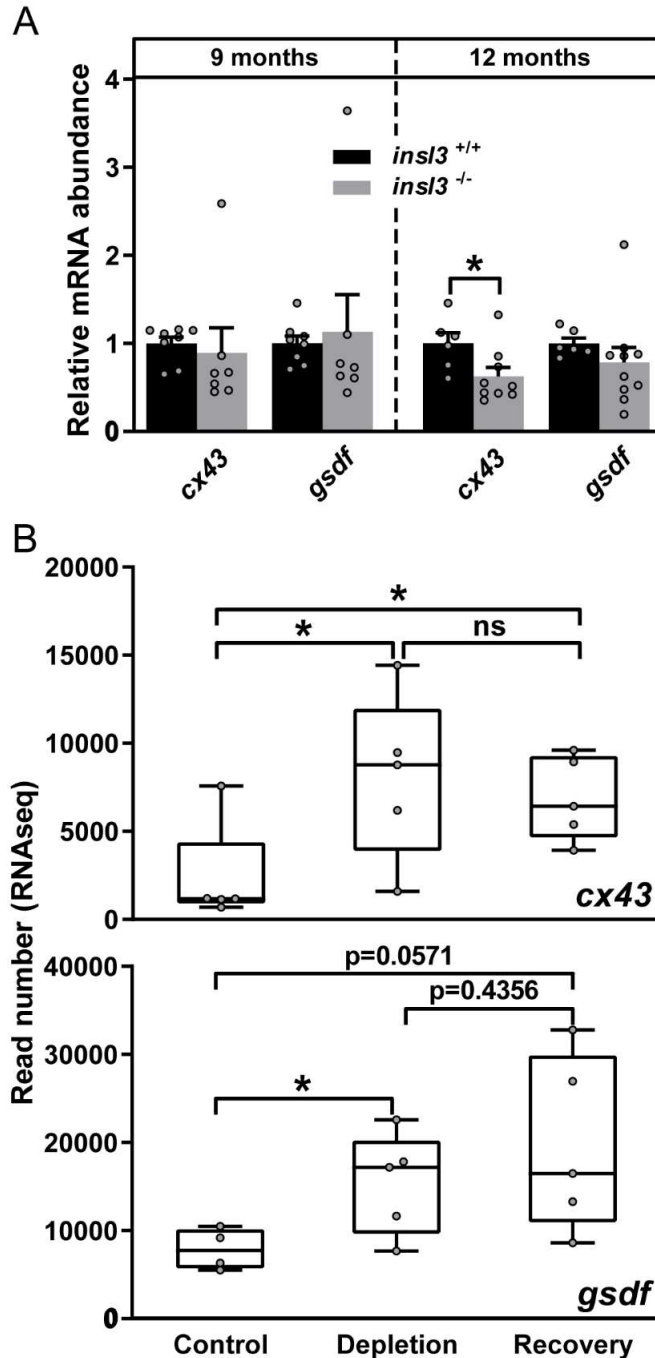

**Supplementary Fig. 3 Testicular expression of selected Sertoli cell genes in *insl3* knockout mutant gonads, and in control, depleted and recovering gonads. a** *cx43* and *gsdf* transcript levels in wild-type (*insl3*<sup>+/+</sup>) and *insl3* knockout (*insl3*<sup>-/-</sup>) testes 9 and 12 months post-fertilization. Data are shown as mean fold change  $\pm$  SEM (*insl3*<sup>+/+</sup> and *insl3*<sup>-/-</sup>, 9 months: N = 8 and 7; *insl3*<sup>+/+</sup> and *insl3*<sup>-/-</sup>, 12 months: N = 6 and 10; \*, p < 0.05) and expressed relative to the wild-type control group (which is set at 1). **b** Expression levels of *cx43* and *gsdf* in control, germ cell-depleted (by exposure to the cytostatic agent busulfan<sup>1</sup>), and testes with recovering (from busulfan) spermatogenesis, as described by Crespo et al.<sup>2</sup> (NCBI GEO data set GSE116611). Data are expressed as mean  $\pm$  SEM (N = 5; \*, p < 0.05). ns, not significant differences between groups.

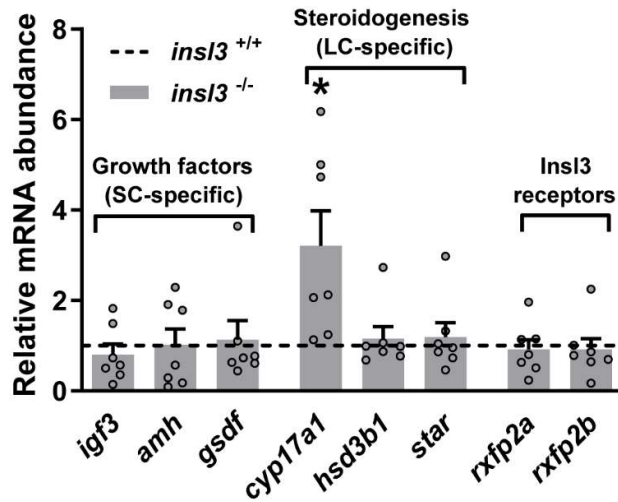

**Supplementary Fig. 4 Testicular expression of selected genes in 9 month-old *insl3* CRISPR-ed zebrafish.** Transcript levels of growth factors, steroidogenesis-related and Insl3 receptors in 9 month-old wild-type (*insl3*<sup>+/+</sup>) and *insl3* knockouts (*insl3*<sup>-/-</sup>) adult testis tissue. Data are mean fold change  $\pm$  SEM (*insl3*<sup>+/+</sup> and *insl3*<sup>-/-</sup>, N = 8 and 7; \*  $p < 0.05$ ) and expressed as relative to the wild-type group (which is set at 1; dashed line). SC, Sertoli cell; LC, Leydig cell.

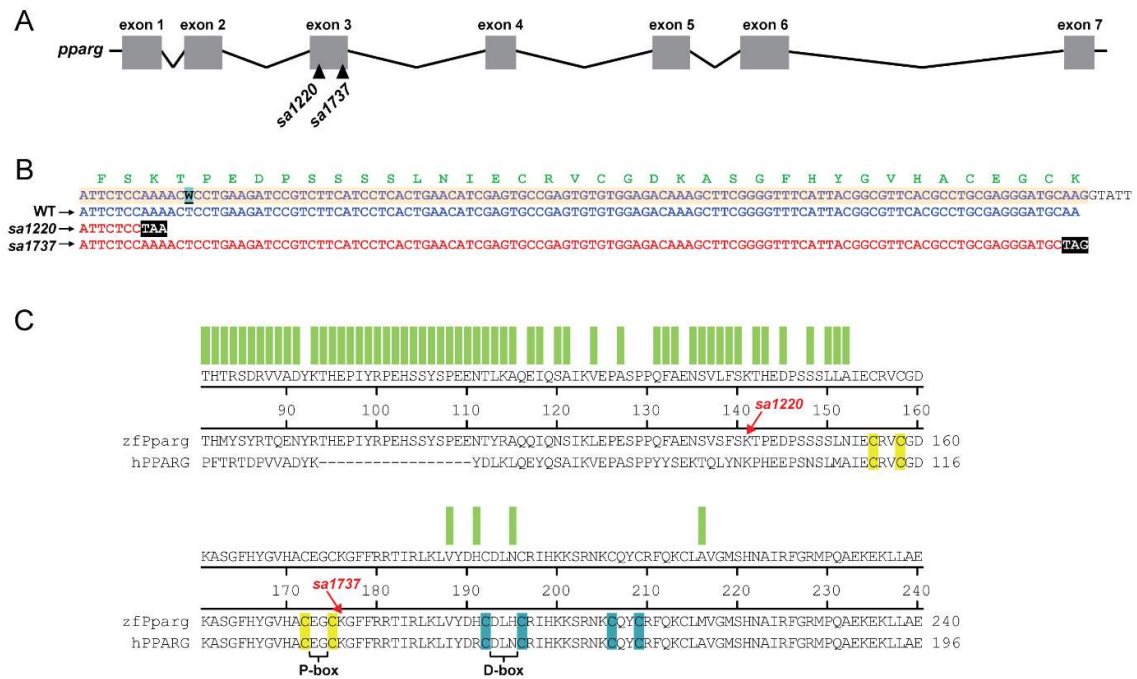

**Supplementary Fig. 5 Schematic description of the zebrafish mutant lines for *pparg* obtained from the Zebrafish International Resource Center (ZIRC).** **a** Diagram showing both point mutations (*sa1220* and *sa1737*) in exon 3 of the *pparg* gene, as indicated by the black arrowheads. **b** Alignment showing the wild-type (WT) *pparg* nucleotide sequence versus the *pparg* knockout mutant sequences. Both mutant *pparg* alleles have an A>T nonsense mutation leading to a premature stop codon (black background) at amino acid 141 (*pparg*<sup>-/-</sup> *sa1220*) or amino acid 176 (*pparg*<sup>-/-</sup> *sa1737*). **c** Amino acid alignment of human and zebrafish PPARG/Pparg proteins, showing amino acid disagreement (green bars), the cysteine residues constituting zinc finger 1 (yellow) and zinc finger 2 (cyan). The Pparg protein in mutant *sa1220* lacks both zinc fingers of the DNA-binding domain as well as the ligand-binding domain (LBD), while the Pparg protein in mutant *sa1737* retains the first zinc finger, including the P-box (responsible for sequence-specific DNA recognition), but lacks the second zinc finger, which harbours the D-box (involved in protein-protein cooperative interaction in the dimerization process) and the subsequent LBD.

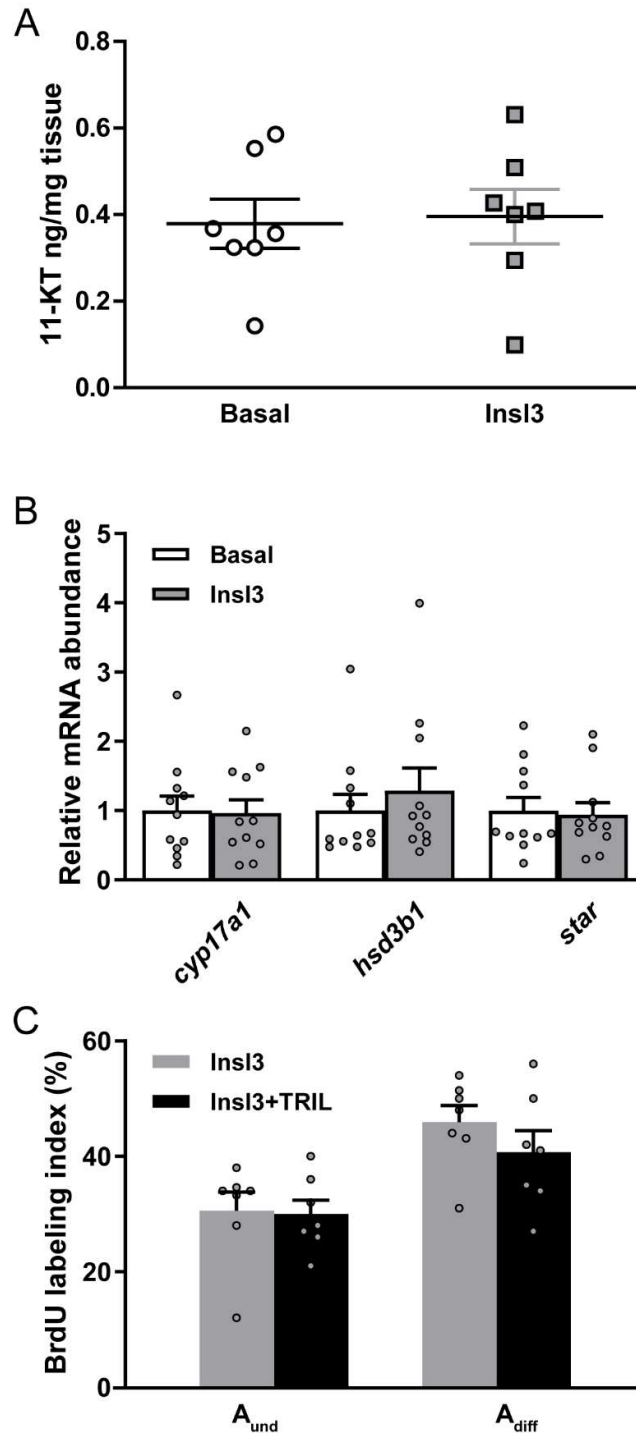

**Supplementary Fig. 6 InsI3-induced effects on spermatogenesis are steroid-independent in zebrafish.** **a-b** 11-ketotestosterone (11-KT) levels in medium (**a**) and steroid-related gene expression in testis tissue (**b**) after incubation in the absence or presence of 100 ng/mL InsI3 for 4 days. **c** Evaluation of the proliferation activity of type A spermatogonia in zebrafish testes cultured for 4 days with 100 ng/mL InsI3, and in the absence or presence of trilostane (TRIL; 25  $\mu$ g/mL). In **a** and **c**, data are shown as mean  $\pm$  SEM (N = 7), and in **b** as mean fold change  $\pm$  SEM (N = 11) and expressed relative to the basal control group (which is set at 1).

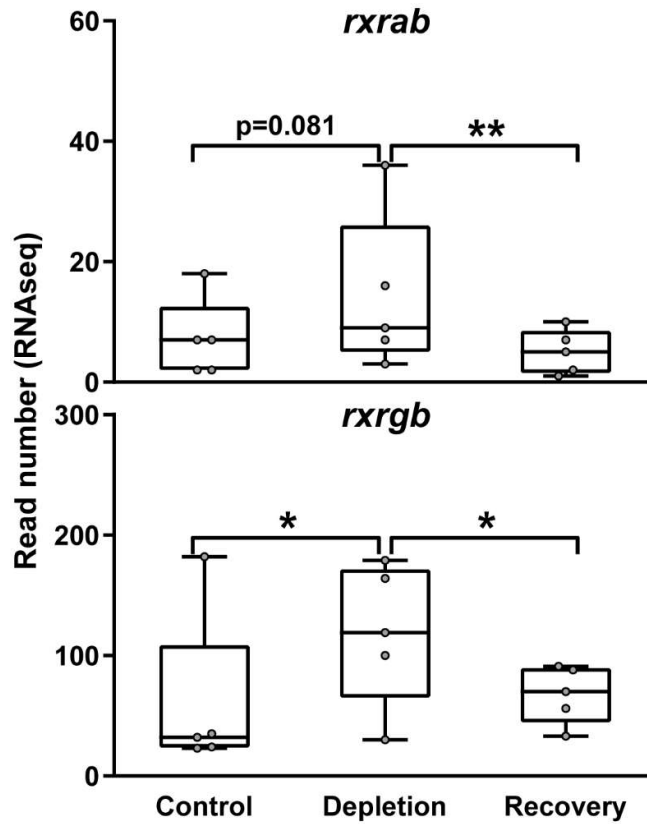

**Supplementary Fig. 7 Testicular expression of selected retinoid X receptors in control, depleted and recovering gonads.** Expression levels of *rxrab* and *rxrgb* in control, germ cell-depleted (by exposure to the cytostatic agent busulfan<sup>1</sup>), and testes with recovering (from busulfan) spermatogenesis, as described by Crespo et al.<sup>2</sup> (NCBI GEO data set GSE116611). Data are expressed as mean  $\pm$  SEM (N = 5; \*, p < 0.05; \*\*, p < 0.01).



**Supplementary Table 1 Sequences of primers used for the generation of transgenic lines.**

| Transgenic line                                                                                       | Primers   | Primer sequence (5'→3')                                 |
|-------------------------------------------------------------------------------------------------------|-----------|---------------------------------------------------------|
| <i>Tg(rxfp2a:EGFP)</i> : zebrafish <i>rxfp2a</i> promoter (3193 bp, preceding the ATG start codon)    | 4703 (Fw) | TA <b>GGCCGGCC</b> TATCACTGAGCTTTATCTAAAGATTTTATAAT     |
|                                                                                                       | 4704 (Rv) | TTC <b>GGCGCGCC</b> AGTGAAGCCTTACAAAAGCATGACCGA         |
| <i>Tg(rxfp2b:mCherry)</i> : zebrafish <i>rxfp2b</i> promoter (3087 bp, preceding the ATG start codon) | 4705 (Fw) | TA <b>GGCCGGCC</b> TCATAATTAAACCTACCGTTATGAAACTGAAGTACC |
|                                                                                                       | 4706 (Rv) | TTC <b>GGCGCGCC</b> TGTGGCGTCGTGCCAGTCATGC              |

**Fsc I** restriction enzyme site; **Asc I** restriction enzyme site.

**Supplementary Table 2 Sequences of primers used in gene expression analyses by qPCR.**

| Target gene     | Gene description                                                             | Primers   | Primer sequence (5'→3')  |
|-----------------|------------------------------------------------------------------------------|-----------|--------------------------|
| <i>aldh1a2</i>  | aldehyde dehydrogenase 1 family, member A2                                   | 4359 (Fw) | CGCTGGATGGGCAGATAAGA     |
|                 |                                                                              | 4360 (Rv) | TCTGGTGAGGGTGAAAAATTCTC  |
| <i>amh</i>      | anti-Mullerian hormone                                                       | 4486 (Fw) | CTCTGACCTTGATGAGCCTCATTT |
|                 |                                                                              | 4487 (Rv) | GGATGTCCCTTAAGAACCTTTGCA |
| <i>casp9</i>    | caspase 9, apoptosis-related cysteine peptidase                              | 6169 (Fw) | ACATACGACTGCTGTGTGGTCAT  |
|                 |                                                                              | 6170 (Rv) | GAAGTGACCCAGGGAATCGA     |
| <i>cyp17a1</i>  | cytochrome P450, family 17, subfamily A, polypeptide 1                       | 2773 (Fw) | GGGAGGCCACGGACTGTTA      |
|                 |                                                                              | 2774 (Rv) | CCATGTGGAACGTAGTCAGCAA   |
| <i>cyp26a1</i>  | cytochrome P450, family 26, subfamily A, polypeptide 1                       | 4383 (Fw) | TGGGCTTGCCGTTTCATTG      |
|                 |                                                                              | 4384 (Rv) | CATGCGCAGAAACTTCCTTCTC   |
| <i>eef1a1l1</i> | eukaryotic translation elongation factor 1 alpha 1, like 1                   | 2476 (Fw) | GCCGTCCCACCGACAAG        |
|                 |                                                                              | 2477 (Rv) | CCACACGACCCACAGGTACAG    |
| <i>gsdf</i>     | gonadal somatic cell derived factor                                          | 2366 (Fw) | CATCTGCGGGAGTCATTGAAA    |
|                 |                                                                              | 2367 (Rv) | CAGAGTCCTCCGGCAAGCT      |
| <i>hsd3b1</i>   | hydroxy-delta-5-steroid dehydrogenase, 3 beta- and steroid delta-isomerase 1 | 5096 (Fw) | GATCCGACTGCTGGATAGAAACA  |
|                 |                                                                              | 5097 (Rv) | CCCGGCAATCATCAAGAGA      |
| <i>insl3</i>    | insulin-like 3 (Leydig cell)                                                 | 2466 (Fw) | TCGCATCGTGTGGGAGTTT      |
|                 |                                                                              | 2467 (Rv) | TGCACAACGAGGTCTCTATCCA   |
| <i>rpl13a</i>   | ribosomal protein L13a                                                       | 3998 (Fw) | GAGCCCCCAGCAGAATCTTC     |
|                 |                                                                              | 3999 (Rv) | AGCCTGACCCCTCTTGTTTT     |
| <i>rxfp2a</i>   | relaxin family peptide receptor 2a                                           | 3258 (Fw) | CAATTCCAGTCTCTGTGACACAT  |
|                 |                                                                              | 3259 (Rv) | CTCAACGTCATCTCCGCAAA     |
| <i>rxfp2b</i>   | relaxin family peptide receptor 2b                                           | 3262 (Fw) | CTGCCAGACTCTGTGCCATA     |
|                 |                                                                              | 3263 (Rv) | AGTCGTGATGCTATTACCTCGAA  |
| <i>star</i>     | steroidogenic acute regulatory protein                                       | 2546 (Fw) | CCTGGAATGCCTGAGCAGAA     |
|                 |                                                                              | 2547 (Rv) | ATCTGCACTTGGTCGCATGAC    |
| <i>ubc</i>      | ubiquitin C                                                                  | 3951 (Fw) | CCATACACCGCACTCTTACAGAAA |
|                 |                                                                              | 3952 (Rv) | CCAGTCAGCGTCTTACAAAAGAT  |
| <i>xiap</i>     | X-linked inhibitor of apoptosis                                              | 6159 (Fw) | CATCCCATTGACCCCTGAGAGA   |
|                 |                                                                              | 6160 (Rv) | CCTCCACATCTGAAGCACATCA   |

Fw, forward; Rv, reverse.

## References

- 1 Nobrega, R. H. *et al.* Spermatogonial stem cell niche and spermatogonial stem cell transplantation in zebrafish. *PLoS One* **5**, doi:10.1371/journal.pone.0012808 (2010).
- 2 Crespo, D. *et al.* Endocrine and local signaling interact to regulate spermatogenesis in zebrafish: follicle-stimulating hormone, retinoic acid and androgens. *Development* **146**, doi:10.1242/dev.178665 (2019).
- 3 Elmore, S. Apoptosis: a review of programmed cell death. *Toxicol Pathol* **35**, 495-516, doi:10.1080/01926230701320337 (2007).
