# Supplementary material for: Insulin-like 3 affects zebrafish spermatogenic cells directly and via Sertoli cells
Source: PubMed Central journal article supplement (PMC7884674; doi:10.1038/s42003-021-01708-y), 2021-02-15
Supplement: 42003_2021_1708_MOESM4_ESM.pdf [file 42003_2021_1708_MOESM4_ESM.pdf]

## **Description of Additional Supplementary Files**

**File name:** Supplementary Data 1.

**Description:** Mapping statistics and complete list of differentially expressed genes identified by RNAseq (N = 3;  $p < 0.05$ ) in Ins13-treated testis tissue.

**File name:** Supplementary Data 2.

**Description:** Source data underlying the graphs shown in the manuscript and Supplementary information.
