# Supplementary material for: Insulin-like 3 affects zebrafish spermatogenic cells directly and via Sertoli cells
Source: Commun Biol. 2021 Feb 15;4:204. doi: 10.1038/s42003-021-01708-y (PMC7884674; doi:10.1038/s42003-021-01708-y)
Supplement: Supplementary file 2 — Supplementary Data 1 [file 42003_2021_1708_MOESM2_ESM.xlsx]

## Sheet: RNAseq_Mapping
Sample_name	Basal_1	Basal_2	Basal_3	Insl3_1	Insl3_2	Insl3_3
Total reads	51389844	52242670	41647714	46828866	45243968	47320710
Total mapped	36945997 (71.89%)	39071154 (74.79%)	30433791 (73.07%)	34489000 (73.65%)	33091325 (73.14%)	34427736 (72.75%)
Multiple mapped	1168854 (2.27%)	1473841 (2.82%)	1201278 (2.88%)	1103750 (2.36%)	1283408 (2.84%)	1665128 (3.52%)
Uniquely mapped	35777143 (69.62%)	37597313 (71.97%)	29232513 (70.19%)	33385250 (71.29%)	31807917 (70.3%)	32762608 (69.24%)
Reads map to '+'	17902517 (34.84%)	18800580 (35.99%)	14617532 (35.1%)	16706656 (35.68%)	15902745 (35.15%)	16386746 (34.63%)
Reads map to '-'	17874626 (34.78%)	18796733 (35.98%)	14614981 (35.09%)	16678594 (35.62%)	15905172 (35.15%)	16375862 (34.61%)
Non-splice reads	15810982 (30.77%)	18462151 (35.34%)	14866863 (35.7%)	15525399 (33.15%)	17213989 (38.05%)	18260126 (38.59%)
Splice reads	19966161 (38.85%)	19135162 (36.63%)	14365650 (34.49%)	17859851 (38.14%)	14593928 (32.26%)	14502482 (30.65%)

## Sheet: RNAseq_DEGs
Transcript version	Transcript ID	Gene ID	Gene symbol	Gene annotation	Mean_Basal	Mean_Insl3	Fold change	P value
ENSDART00000043961.7	ENSDART00000043961	ENSDARG00000019521	MPX	myeloid-specific peroxidase [Source:ZFIN;Acc:ZDB-GENE-030131-9460]	12.3333	75	6.08108	0.0118954
ENSDART00000130630.3	ENSDART00000130630	ENSDARG00000087054	GGT1L2.2	gamma-glutamyltransferase 1 like 2.2 [Source:ZFIN;Acc:ZDB-GENE-090312-37]	12.3333	38	3.08108	0.00287461
ENSDART00000168345.1	ENSDART00000168345	ENSDARG00000102455	ZNF1133	zinc finger protein 1133 [Source:ZFIN;Acc:ZDB-GENE-110913-178]	10.6667	31	2.90625	0.0084123
ENSDART00000163579.1	ENSDART00000163579	ENSDARG00000104199	SI:DKEY-43P13.5	si:dkey-43p13.5 [Source:ZFIN;Acc:ZDB-GENE-131121-510]	10.6667	29	2.71875	0.0283744
ENSDART00000144483.1	ENSDART00000144483	ENSDARG00000093451	PIMR156	Pim proto-oncogene, serine/threonine kinase, related 156 [Source:ZFIN;Acc:ZDB-GENE-081028-36]	13.3333	35.6667	2.675	0.0355163
ENSDART00000159760.1	ENSDART00000159760	ENSDARG00000005392	SLC5A5	solute carrier family 5 (sodium/iodide cotransporter), member 5 [Source:ZFIN;Acc:ZDB-GENE-060503-585]	15	39.3333	2.62222	0.0246825
ENSDART00000144538.2	ENSDART00000144538	ENSDARG00000092016	BX296549.2	N/A	16.3333	42	2.57143	0.0105903
ENSDART00000052461.6	ENSDART00000052461	ENSDARG00000070740	PIMR89	Pim proto-oncogene, serine/threonine kinase, related 89 [Source:ZFIN;Acc:ZDB-GENE-060503-676]	13	33.3333	2.5641	0.0439206
ENSDART00000160724.1	ENSDART00000160724	ENSDARG00000075664	SI:CH1073-429I10.1	si:ch1073-429i10.1 [Source:ZFIN;Acc:ZDB-GENE-120215-259]	16	40.6667	2.54167	0.0155466
ENSDART00000103004.5	ENSDART00000103004	ENSDARG00000074745	ZMP:0000000760	zmp:0000000760 [Source:ZFIN;Acc:ZDB-GENE-130530-763]	15.6667	38.6667	2.46809	0.00105502
ENSDART00000157694.1	ENSDART00000157694	ENSDARG00000062976	IFFO1A	intermediate filament family orphan 1a [Source:ZFIN;Acc:ZDB-GENE-060503-418]	13.3333	32.6667	2.45	0.00288454
ENSDART00000047007.5	ENSDART00000047007	ENSDARG00000045638	SLC13A1	solute carrier family 13 member 1 [Source:ZFIN;Acc:ZDB-GENE-031222-3]	31.6667	77.3333	2.44211	0.00524002
ENSDART00000168394.1	ENSDART00000168394	ENSDARG00000100069	BX510646.1	N/A	14.6667	35.6667	2.43182	0.0425176
ENSDART00000155197.1	ENSDART00000155197	ENSDARG00000097483	SI:CH211-213D14.2	si:ch211-213d14.2 [Source:ZFIN;Acc:ZDB-GENE-030131-8357]	13.6667	33	2.41463	0.0470278
ENSDART00000114878.3	ENSDART00000114878	ENSDARG00000077337	SI:CH211-171H4.5	si:ch211-171h4.5 [Source:ZFIN;Acc:ZDB-GENE-081104-151]	16	37.3333	2.33333	0.0434064
ENSDART00000150644.1	ENSDART00000150644	ENSDARG00000096065	SI:DKEY-156K2.7	si:dkey-156k2.7 [Source:ZFIN;Acc:ZDB-GENE-110914-110]	12.3333	28.6667	2.32432	0.00727345
ENSDART00000166732.1	ENSDART00000166732	ENSDARG00000077344	SI:DKEY-27D5.14	si:dkey-27d5.14 [Source:ZFIN;Acc:ZDB-GENE-141216-38]	39.3333	88.6667	2.25424	0.0061321
ENSDART00000045135.6	ENSDART00000045135	ENSDARG00000033949	FBXO16	F-box protein 16 [Source:ZFIN;Acc:ZDB-GENE-041015-747]	12	27	2.25	0.0162145
ENSDART00000133306.1	ENSDART00000133306	ENSDARG00000092462	PIMR151	Pim proto-oncogene, serine/threonine kinase, related 151 [Source:ZFIN;Acc:ZDB-GENE-081028-3]	19.3333	43	2.22414	0.0361163
ENSDART00000137279.2	ENSDART00000137279	ENSDARG00000095054	PIMR148	Pim proto-oncogene, serine/threonine kinase, related 148 [Source:ZFIN;Acc:ZDB-GENE-141211-47]	19	41.3333	2.17544	0.0171277
ENSDART00000158076.1	ENSDART00000158076	ENSDARG00000099789	SI:CH211-76M11.7	si:ch211-76m11.7 [Source:ZFIN;Acc:ZDB-GENE-041210-279]	19.6667	42.3333	2.15254	0.0219951
ENSDART00000155448.1	ENSDART00000155448	ENSDARG00000089540	PIMR18	Pim proto-oncogene, serine/threonine kinase, related 18 [Source:ZFIN;Acc:ZDB-GENE-131125-87]	47.3333	100.333	2.11972	0.0330955
ENSDART00000143952.1	ENSDART00000143952	ENSDARG00000017490	CEL.1	carboxyl ester lipase, tandem duplicate 1 [Source:ZFIN;Acc:ZDB-GENE-030131-1201]	17	36	2.11765	0.0337971
ENSDART00000046766.4	ENSDART00000046766	ENSDARG00000031337	HOXA10B	homeobox A10b [Source:ZFIN;Acc:ZDB-GENE-990415-97]	26	54.6667	2.10256	0.00148646
ENSDART00000125710.2	ENSDART00000125710	ENSDARG00000086018	PIMR15	Pim proto-oncogene, serine/threonine kinase, related 15 [Source:ZFIN;Acc:ZDB-GENE-131120-63]	41	85.6667	2.08943	0.0263364
ENSDART00000147964.1	ENSDART00000147964	ENSDARG00000093135	SI:DKEY-117N7.2	si:dkey-117n7.2 [Source:ZFIN;Acc:ZDB-GENE-060503-49]	18.6667	39	2.08929	0.00602805
ENSDART00000137482.2	ENSDART00000137482	ENSDARG00000093245	PIMR32	Pim proto-oncogene, serine/threonine kinase, related 32 [Source:ZFIN;Acc:ZDB-GENE-131126-8]	43.3333	90	2.07692	0.0481413
ENSDART00000154759.2	ENSDART00000154759	ENSDARG00000078211	ESPNLA	espin-like a [Source:ZFIN;Acc:ZDB-GENE-131121-3]	17.6667	36.6667	2.07547	0.0446233
ENSDART00000170980.1	ENSDART00000170980	ENSDARG00000099365	EVX1	even-skipped homeobox 1 [Source:ZFIN;Acc:ZDB-GENE-980526-364]	14.3333	29.6667	2.06977	0.0150903
ENSDART00000135483.2	ENSDART00000135483	ENSDARG00000013051	ZGC:158412	zgc:158412 [Source:ZFIN;Acc:ZDB-GENE-061201-18]	10.3333	21.3333	2.06452	0.0328273
ENSDART00000113625.1	ENSDART00000113625	ENSDARG00000093808	PIMR113	Pim proto-oncogene, serine/threonine kinase, related 113 [Source:ZFIN;Acc:ZDB-GENE-041014-289]	15.6667	32.3333	2.06383	0.0248992
ENSDART00000122668.2	ENSDART00000122668	ENSDARG00000079307	N/A	N/A	109	224	2.05505	0.0427118
ENSDART00000010786.5	ENSDART00000010786	ENSDARG00000015072	DMRT2A	doublesex and mab-3 related transcription factor 2a [Source:ZFIN;Acc:ZDB-GENE-990621-7]	121.333	248.333	2.0467	0.0261247
ENSDART00000132695.1	ENSDART00000132695	ENSDARG00000092064	SI:DKEY-117N7.4	si:dkey-117n7.4 [Source:ZFIN;Acc:ZDB-GENE-060503-237]	24.6667	50.3333	2.04054	0.0249689
ENSDART00000154080.1	ENSDART00000154080	ENSDARG00000089731	PIMR5	Pim proto-oncogene, serine/threonine kinase, related 5 [Source:ZFIN;Acc:ZDB-GENE-131125-73]	17.3333	35.3333	2.03846	0.0104586
ENSDART00000148075.2	ENSDART00000148075	ENSDARG00000075855	ADGRE10	adhesion G protein-coupled receptor E10 [Source:ZFIN;Acc:ZDB-GENE-090313-152]	28.6667	58.3333	2.03488	0.0432559
ENSDART00000112677.3	ENSDART00000112677	ENSDARG00000070812	SI:CH211-156L18.6	si:ch211-156l18.6 [Source:ZFIN;Acc:ZDB-GENE-141222-85]	72	146	2.02778	0.0154702
ENSDART00000105997.3	ENSDART00000105997	ENSDARG00000031875	TRPA1B	transient receptor potential cation channel, subfamily A, member 1b [Source:ZFIN;Acc:ZDB-GENE-050106-1]	18.3333	36.3333	1.98182	0.0201519
ENSDART00000168877.1	ENSDART00000168877	ENSDARG00000059053	SLC13A4	solute carrier family 13 (sodium/sulfate symporter), member 4 [Source:ZFIN;Acc:ZDB-GENE-070424-71]	73.6667	145.667	1.97738	0.0137538
ENSDART00000171308.1	ENSDART00000171308	ENSDARG00000104344	ZMP:0000000930	zmp:0000000930 [Source:ZFIN;Acc:ZDB-GENE-130530-933]	14	27.6667	1.97619	0.0359299
ENSDART00000131549.2	ENSDART00000131549	ENSDARG00000092514	PIMR167	Pim proto-oncogene, serine/threonine kinase, related 167 [Source:ZFIN;Acc:ZDB-GENE-141211-50]	25	49.3333	1.97333	0.0310283
ENSDART00000056305.4	ENSDART00000056305	ENSDARG00000038569	FZD8B	frizzled class receptor 8b [Source:ZFIN;Acc:ZDB-GENE-000328-4]	39	76.3333	1.95726	0.00939226
ENSDART00000101575.4	ENSDART00000101575	ENSDARG00000089640	SI:DKEY-117N7.5	si:dkey-117n7.5 [Source:ZFIN;Acc:ZDB-GENE-060503-331]	19.3333	37.6667	1.94828	0.0438522
ENSDART00000073511.4	ENSDART00000073511	ENSDARG00000038166	HYAL6	hyaluronoglucosaminidase 6 [Source:ZFIN;Acc:ZDB-GENE-070112-2372]	69.3333	135	1.94712	0.00418424
ENSDART00000137947.2	ENSDART00000137947	ENSDARG00000096086	TAAR20J	trace amine associated receptor 20j [Source:ZFIN;Acc:ZDB-GENE-060414-15]	19.3333	37.3333	1.93103	0.0151874
ENSDART00000050000.2	ENSDART00000050000	ENSDARG00000033726	TSHBA	thyroid stimulating hormone, beta subunit, a [Source:ZFIN;Acc:ZDB-GENE-030513-3]	23.3333	45	1.92857	0.0402292
ENSDART00000084007.6	ENSDART00000084007	ENSDARG00000062902	N/A	N/A	12.6667	24.3333	1.92105	0.0450769
ENSDART00000176576.1	ENSDART00000176576	ENSDARG00000061101	SNX19A	sorting nexin 19a [Source:ZFIN;Acc:ZDB-GENE-060526-204]	33	63.3333	1.91919	0.0156379
ENSDART00000171321.1	ENSDART00000171321	ENSDARG00000101128	SI:DKEY-211F22.5	si:dkey-211f22.5 [Source:ZFIN;Acc:ZDB-GENE-141216-381]	24.3333	46	1.89041	0.0278962
ENSDART00000165614.1	ENSDART00000165614	ENSDARG00000102529	PIMR182	Pim proto-oncogene, serine/threonine kinase, related 182 [Source:ZFIN;Acc:ZDB-GENE-141222-19]	29.6667	56	1.88764	0.0404425
ENSDART00000088618.1	ENSDART00000088618	ENSDARG00000061818	MEOX2B	mesenchyme homeobox 2b [Source:ZFIN;Acc:ZDB-GENE-060503-853]	55.3333	103.667	1.87349	0.0149507
ENSDART00000149342.1	ENSDART00000149342	ENSDARG00000078331	BEST1	bestrophin 1 [Source:ZFIN;Acc:ZDB-GENE-110411-214]	18.3333	34.3333	1.87273	0.0343527
ENSDART00000177251.1	ENSDART00000177251	ENSDARG00000094210	ZGC:109934	zgc:109934 [Source:ZFIN;Acc:ZDB-GENE-050522-428]	43	80.3333	1.86822	0.00338644
ENSDART00000152220.1	ENSDART00000152220	ENSDARG00000026383	SI:DKEY-27J5.5	si:dkey-27j5.5 [Source:ZFIN;Acc:ZDB-GENE-121214-264]	29.6667	55.3333	1.86517	0.0266112
ENSDART00000029386.6	ENSDART00000029386	ENSDARG00000012881	SLC4A1A	solute carrier family 4 (anion exchanger), member 1a (Diego blood group) [Source:ZFIN;Acc:ZDB-GENE-010525-1]	46.6667	87	1.86429	0.00124072
ENSDART00000105761.3	ENSDART00000105761	ENSDARG00000071497	ZIC3	zic family member 3 heterotaxy 1 (odd-paired homolog, Drosophila) [Source:ZFIN;Acc:ZDB-GENE-030708-2]	17.6667	32.3333	1.83019	0.0470635
ENSDART00000170991.1	ENSDART00000170991	ENSDARG00000100009	ZGC:91850	zgc:91850 [Source:ZFIN;Acc:ZDB-GENE-040801-211]	68.6667	123.667	1.80097	0.0240298
ENSDART00000159708.1	ENSDART00000159708	ENSDARG00000097037	PIMR42	Pim proto-oncogene, serine/threonine kinase, related 42 [Source:ZFIN;Acc:ZDB-GENE-131126-5]	18.3333	33	1.8	0.0463579
ENSDART00000159183.1	ENSDART00000159183	ENSDARG00000076357	CABZ01102039.1	N/A	305	546.667	1.79235	0.0285006
ENSDART00000101216.2	ENSDART00000101216	ENSDARG00000069504	SI:DKEY-88E18.2	si:dkey-88e18.2 [Source:ZFIN;Acc:ZDB-GENE-110411-159]	47.3333	84.6667	1.78873	0.0105914
ENSDART00000160177.1	ENSDART00000160177	ENSDARG00000038862	KCNB2	potassium voltage-gated channel, Shab-related subfamily, member 2 [Source:ZFIN;Acc:ZDB-GENE-070912-170]	60.3333	107.667	1.78453	0.0329742
ENSDART00000130560.2	ENSDART00000130560	ENSDARG00000089502	PIMR23	Pim proto-oncogene, serine/threonine kinase, related 23 [Source:ZFIN;Acc:ZDB-GENE-131120-48]	80.6667	143.667	1.78099	0.00555204
ENSDART00000061139.6	ENSDART00000061139	ENSDARG00000041715	BCO2B	beta-carotene oxygenase 2b [Source:ZFIN;Acc:ZDB-GENE-060421-7448]	30.3333	54	1.78022	0.019267
ENSDART00000170586.1	ENSDART00000170586	ENSDARG00000099018	BX537296.2	N/A	74.3333	131.667	1.7713	0.0225622
ENSDART00000143474.1	ENSDART00000143474	ENSDARG00000092919	ZP3C	zona pellucida glycoprotein 3c [Source:ZFIN;Acc:ZDB-GENE-060817-5]	213.333	377	1.76719	0.0320997
ENSDART00000159224.1	ENSDART00000159224	ENSDARG00000101581	BX537296.5	N/A	24.3333	43	1.76712	0.0382916
ENSDART00000098500.4	ENSDART00000098500	ENSDARG00000056477	CCDC125	coiled-coil domain containing 125 [Source:ZFIN;Acc:ZDB-GENE-060526-104]	109.333	192.667	1.7622	0.00102111
ENSDART00000165604.1	ENSDART00000165604	ENSDARG00000088366	ZGC:77938	zgc:77938 [Source:ZFIN;Acc:ZDB-GENE-040426-1910]	57.3333	101	1.76163	0.0450013
ENSDART00000016303.5	ENSDART00000016303	ENSDARG00000001785	IRX2A	iroquois homeobox 2a [Source:ZFIN;Acc:ZDB-GENE-040426-1446]	14.6667	25.6667	1.75	0.0468016
ENSDART00000078628.2	ENSDART00000078628	ENSDARG00000079231	SLC7A14B	solute carrier family 7, member 14b [Source:ZFIN;Acc:ZDB-GENE-091113-47]	26.3333	45.6667	1.73418	0.0338278
ENSDART00000041564.6	ENSDART00000041564	ENSDARG00000023683	CACNA1FB	calcium channel, voltage-dependent, L type, alpha 1F subunit [Source:ZFIN;Acc:ZDB-GENE-031104-1]	40	68.6667	1.71667	0.0143066
ENSDART00000089980.5	ENSDART00000089980	ENSDARG00000062328	RASGRP2	RAS guanyl releasing protein 2 (calcium and DAG-regulated) [Source:ZFIN;Acc:ZDB-GENE-091118-124]	31.6667	54.3333	1.71579	0.0455967
ENSDART00000132894.1	ENSDART00000132894	ENSDARG00000069542	SI:DKEY-8E10.2	si:dkey-8e10.2 [Source:ZFIN;Acc:ZDB-GENE-081104-441]	25	42.6667	1.70667	0.0177134
ENSDART00000178369.1	ENSDART00000178369	ENSDARG00000076255	ZNF1084	zinc finger protein 1084 [Source:ZFIN;Acc:ZDB-GENE-110913-77]	16.3333	27.6667	1.69388	0.0429822
ENSDART00000058987.6	ENSDART00000058987	ENSDARG00000091232	KCNJ1A.1	potassium inwardly-rectifying channel, subfamily J, member 1a, tandem duplicate 1 [Source:ZFIN;Acc:ZDB-GENE-031118-55]	69.6667	118	1.69378	0.00935024
ENSDART00000075837.5	ENSDART00000075837	ENSDARG00000053746	CABZ01084566.1	N/A	70	118.333	1.69048	0.0462529
ENSDART00000140230.1	ENSDART00000140230	ENSDARG00000017489	ZGC:123068	zgc:123068 [Source:ZFIN;Acc:ZDB-GENE-051030-98]	2541.67	4248.33	1.67148	0.0339273
ENSDART00000139072.1	ENSDART00000139072	ENSDARG00000093187	SI:CH211-221N20.1	si:ch211-221n20.1 [Source:ZFIN;Acc:ZDB-GENE-041014-227]	48.3333	80.6667	1.66897	0.0155593
ENSDART00000156813.1	ENSDART00000156813	ENSDARG00000058413	RNASET2L	ribonuclease T2, like [Source:ZFIN;Acc:ZDB-GENE-090819-2]	31.3333	52	1.65957	0.0307965
ENSDART00000144492.3	ENSDART00000144492	ENSDARG00000087532	SI:CH211-278P9.1	si:ch211-278p9.1 [Source:ZFIN;Acc:ZDB-GENE-081028-46]	47.3333	78	1.64789	0.0380927
ENSDART00000100551.6	ENSDART00000100551	ENSDARG00000011983	ZGC:136908	zgc:136908 [Source:ZFIN;Acc:ZDB-GENE-060312-22]	45	74	1.64444	0.03041
ENSDART00000015277.6	ENSDART00000015277	ENSDARG00000006207	GPX1B	glutathione peroxidase 1b [Source:ZFIN;Acc:ZDB-GENE-040912-60]	292.333	480	1.64196	0.0283557
ENSDART00000164041.1	ENSDART00000164041	ENSDARG00000099098	C1GALT1	core 1 synthase, glycoprotein-N-acetylgalactosamine 3-beta-galactosyltransferase 1 [Source:HGNC Symbol;Acc:HGNC:24337]	64	104.333	1.63021	0.0479975
ENSDART00000101601.5	ENSDART00000101601	ENSDARG00000057328	CTH1	cysteine three histidine 1 [Source:ZFIN;Acc:ZDB-GENE-990806-20]	22.3333	36.3333	1.62687	0.0387174
ENSDART00000051756.5	ENSDART00000051756	ENSDARG00000035686	MON1BA	MON1 secretory trafficking family member Ba [Source:ZFIN;Acc:ZDB-GENE-081104-318]	21.3333	34.6667	1.625	0.0348906
ENSDART00000123017.2	ENSDART00000123017	ENSDARG00000090449	SP100.3	SP110 nuclear body protein, tandem duplicate 3 [Source:ZFIN;Acc:ZDB-GENE-130530-997]	330.333	535.333	1.62059	0.00262726
ENSDART00000093093.6	ENSDART00000093093	ENSDARG00000063604	CORO2BB	coronin, actin binding protein, 2Bb [Source:ZFIN;Acc:ZDB-GENE-071009-5]	184.667	297.667	1.61191	0.0454904
ENSDART00000136714.2	ENSDART00000136714	ENSDARG00000052758	PIMR130	Pim proto-oncogene, serine/threonine kinase, related 130 [Source:ZFIN;Acc:ZDB-GENE-041014-24]	226.667	361.667	1.59559	0.0492877
ENSDART00000131009.2	ENSDART00000131009	ENSDARG00000018817	BDNF	brain-derived neurotrophic factor [Source:ZFIN;Acc:ZDB-GENE-000412-1]	33	52.3333	1.58586	0.0221116
ENSDART00000165966.1	ENSDART00000165966	ENSDARG00000105129	CABZ01103941.1	N/A	62.6667	99.3333	1.58511	0.0139554
ENSDART00000163349.1	ENSDART00000163349	ENSDARG00000104247	CABZ01041996.3	N/A	41.6667	66	1.584	0.0267272
ENSDART00000055936.4	ENSDART00000055936	ENSDARG00000053499	ISL2B	ISL LIM homeobox 2b [Source:ZFIN;Acc:ZDB-GENE-990415-133]	42.6667	67.3333	1.57812	0.0408947
ENSDART00000156690.2	ENSDART00000156690	ENSDARG00000097679	FTR88	finTRIM family, member 88 [Source:ZFIN;Acc:ZDB-GENE-131125-2]	1217.67	1920.67	1.57733	0.00324652
ENSDART00000167949.2	ENSDART00000167949	ENSDARG00000099761	VOX	ventral homeobox [Source:ZFIN;Acc:ZDB-GENE-010108-1]	28.3333	44.6667	1.57647	0.0231095
ENSDART00000150760.1	ENSDART00000150760	ENSDARG00000096083	SI:DKEY-21H14.8	si:dkey-21h14.8 [Source:ZFIN;Acc:ZDB-GENE-110913-34]	57.3333	90.3333	1.57558	0.0382522
ENSDART00000146717.2	ENSDART00000146717	ENSDARG00000044776	CLIC3	chloride intracellular channel 3 [Source:ZFIN;Acc:ZDB-GENE-010507-2]	57	89.6667	1.5731	0.0104135
ENSDART00000105574.3	ENSDART00000105574	ENSDARG00000053525	ENPP7.2	ectonucleotide pyrophosphatase/phosphodiesterase 7, tandem duplicate 2 [Source:ZFIN;Acc:ZDB-GENE-130531-2]	34.3333	54	1.57282	0.0179746
ENSDART00000162654.1	ENSDART00000162654	ENSDARG00000104681	SI:DKEYP-87D1.1	si:dkeyp-87d1.1 [Source:ZFIN;Acc:ZDB-GENE-041014-75]	37.6667	59	1.56637	0.0371376
ENSDART00000026679.7	ENSDART00000026679	ENSDARG00000004643	CDHR1A	cadherin-related family member 1a [Source:ZFIN;Acc:ZDB-GENE-040924-4]	90.3333	141.333	1.56458	0.0250035
ENSDART00000146060.2	ENSDART00000146060	ENSDARG00000094120	BX548047.3	N/A	51.6667	80.6667	1.56129	0.0225097
ENSDART00000081386.5	ENSDART00000081386	ENSDARG00000058546	SI:DKEY-30C15.12	si:dkey-30c15.12 [Source:ZFIN;Acc:ZDB-GENE-060503-920]	70.3333	109.667	1.55924	0.0026514
ENSDART00000056161.6	ENSDART00000056161	ENSDARG00000053366	FTR12	finTRIM family, member 12 [Source:ZFIN;Acc:ZDB-GENE-070912-196]	181.667	282.333	1.55413	0.0232179
ENSDART00000143407.2	ENSDART00000143407	ENSDARG00000093301	PIMR36	Pim proto-oncogene, serine/threonine kinase, related 36 [Source:ZFIN;Acc:ZDB-GENE-141216-59]	86.6667	134.667	1.55385	0.034197
ENSDART00000144033.2	ENSDART00000144033	ENSDARG00000092390	CR354385.1	N/A	57.3333	89	1.55233	0.0410757
ENSDART00000051530.5	ENSDART00000051530	ENSDARG00000035550	CFAP73	cilia and flagella associated protein 73 [Source:ZFIN;Acc:ZDB-GENE-060526-194]	60	92.6667	1.54444	0.0125589
ENSDART00000149833.2	ENSDART00000149833	ENSDARG00000070726	CNGA3A	cyclic nucleotide gated channel alpha 3a [Source:ZFIN;Acc:ZDB-GENE-090611-2]	26.3333	40.6667	1.5443	0.0342892
ENSDART00000165713.1	ENSDART00000165713	ENSDARG00000100521	FO704710.2	N/A	91	140.333	1.54212	0.043581
ENSDART00000077809.4	ENSDART00000077809	ENSDARG00000056029	CYP26C1	cytochrome P450, family 26, subfamily C, polypeptide 1 [Source:ZFIN;Acc:ZDB-GENE-050714-2]	24.6667	38	1.54054	0.0374542
ENSDART00000063577.6	ENSDART00000063577	ENSDARG00000043309	OBSCNA	obscurin, cytoskeletal calmodulin and titin-interacting RhoGEF a [Source:ZFIN;Acc:ZDB-GENE-040812-4]	335.333	515.333	1.53678	0.0272149
ENSDART00000133641.1	ENSDART00000133641	ENSDARG00000056211	OGFOD2	2-oxoglutarate and iron-dependent oxygenase domain containing 2 [Source:ZFIN;Acc:ZDB-GENE-061215-54]	41.3333	63.3333	1.53226	0.0183017
ENSDART00000122773.2	ENSDART00000122773	ENSDARG00000014480	NR6A1B	nuclear receptor subfamily 6, group A, member 1b [Source:ZFIN;Acc:ZDB-GENE-040724-202]	81	124	1.53086	0.0110261
ENSDART00000079293.5	ENSDART00000079293	ENSDARG00000056765	ELA2L	elastase 2 like [Source:ZFIN;Acc:ZDB-GENE-040511-1]	26.3333	40	1.51899	0.0423597
ENSDART00000156620.2	ENSDART00000156620	ENSDARG00000092961	FTR26	finTRIM family, member 26 [Source:ZFIN;Acc:ZDB-GENE-070912-316]	200.667	304	1.51495	0.0156083
ENSDART00000161514.1	ENSDART00000161514	ENSDARG00000104296	CABZ01079986.1	N/A	34.3333	52	1.51456	0.0348388
ENSDART00000012712.6	ENSDART00000012712	ENSDARG00000020946	AUTS2B	autism susceptibility candidate 2b [Source:ZFIN;Acc:ZDB-GENE-131127-20]	52	78.6667	1.51282	0.0352626
ENSDART00000066439.6	ENSDART00000066439	ENSDARG00000045190	CH25H	cholesterol 25-hydroxylase [Source:ZFIN;Acc:ZDB-GENE-041212-81]	88	132	1.5	0.00766242
ENSDART00000098239.4	ENSDART00000098239	ENSDARG00000025403	FTR83	finTRIM family, member 83 [Source:ZFIN;Acc:ZDB-GENE-031002-11]	184.333	276.333	1.4991	0.0269103
ENSDART00000158975.1	ENSDART00000158975	ENSDARG00000104640	BX511034.8	N/A	206.667	307.667	1.48871	0.0157766
ENSDART00000010199.8	ENSDART00000010199	ENSDARG00000013813	FAM219AB	family with sequence similarity 219, member Ab [Source:ZFIN;Acc:ZDB-GENE-050522-213]	31.6667	47	1.48421	0.0479677
ENSDART00000165513.1	ENSDART00000165513	ENSDARG00000099693	AL935065.1	N/A	60	89	1.48333	0.0317777
ENSDART00000112495.2	ENSDART00000112495	ENSDARG00000079497	TCIM	zgc:110340 [Source:ZFIN;Acc:ZDB-GENE-050320-36]	153.333	227	1.48043	0.00853166
ENSDART00000052927.6	ENSDART00000052927	ENSDARG00000076010	TWIST1B	twist family bHLH transcription factor 1b [Source:ZFIN;Acc:ZDB-GENE-050417-357]	83.3333	122.667	1.472	0.00604569
ENSDART00000159723.1	ENSDART00000159723	ENSDARG00000095645	PIMR58	Pim proto-oncogene, serine/threonine kinase, related 58 [Source:ZFIN;Acc:ZDB-GENE-060526-96]	314.667	461.667	1.46716	0.0427121
ENSDART00000127923.3	ENSDART00000127923	ENSDARG00000059097	NKTR	natural killer cell triggering receptor [Source:ZFIN;Acc:ZDB-GENE-030131-1725]	3074	4480.67	1.4576	0.0114647
ENSDART00000106680.4	ENSDART00000106680	ENSDARG00000076679	RAI1	retinoic acid induced 1 [Source:ZFIN;Acc:ZDB-GENE-101203-2]	128.333	186.333	1.45195	0.0454822
ENSDART00000035011.7	ENSDART00000035011	ENSDARG00000027472	GPHB5	glycoprotein hormone beta 5 [Source:ZFIN;Acc:ZDB-GENE-090319-4]	81.3333	118	1.45082	0.023869
ENSDART00000136071.2	ENSDART00000136071	ENSDARG00000074754	SI:DKEY-188I13.9	si:dkey-188i13.9 [Source:ZFIN;Acc:ZDB-GENE-090313-211]	514	745.333	1.45006	0.0187572
ENSDART00000168349.1	ENSDART00000168349	ENSDARG00000079111	N/A	N/A	66.6667	96.6667	1.45	0.0175629
ENSDART00000156209.2	ENSDART00000156209	ENSDARG00000067762	PIMR59	Pim proto-oncogene, serine/threonine kinase, related 59 [Source:ZFIN;Acc:ZDB-GENE-060526-85]	212.333	307.333	1.44741	0.0253498
ENSDART00000177877.1	ENSDART00000177877	ENSDARG00000025504	GUCY2F	guanylate cyclase 2F, retinal [Source:ZFIN;Acc:ZDB-GENE-011128-7]	47	68	1.44681	0.0479854
ENSDART00000166313.1	ENSDART00000166313	ENSDARG00000021163	THRB	thyroid hormone receptor beta [Source:ZFIN;Acc:ZDB-GENE-990415-268]	45	65	1.44444	0.0457291
ENSDART00000134091.1	ENSDART00000134091	ENSDARG00000076552	ZGC:193801	zgc:193801 [Source:ZFIN;Acc:ZDB-GENE-081022-40]	35.6667	51.3333	1.43925	0.0359651
ENSDART00000125014.3	ENSDART00000125014	ENSDARG00000042122	ACOT11B	acyl-CoA thioesterase 11b [Source:ZFIN;Acc:ZDB-GENE-051127-37]	70.6667	101.667	1.43868	0.0315293
ENSDART00000041912.6	ENSDART00000041912	ENSDARG00000005913	TGM1L3	transglutaminase 1 like 3 [Source:ZFIN;Acc:ZDB-GENE-120718-1]	932.333	1341	1.43833	0.00214511
ENSDART00000097600.4	ENSDART00000097600	ENSDARG00000067767	PIMR59	Pim proto-oncogene, serine/threonine kinase, related 59 [Source:ZFIN;Acc:ZDB-GENE-060526-85]	207.333	295	1.42283	0.0463171
ENSDART00000106221.3	ENSDART00000106221	ENSDARG00000071719	SI:DKEY-20I20.2	si:dkey-20i20.2 [Source:ZFIN;Acc:ZDB-GENE-060503-528]	41	58	1.41463	0.0423346
ENSDART00000151713.2	ENSDART00000151713	ENSDARG00000027192	HCN3	hyperpolarization activated cyclic nucleotide-gated potassium channel 3 [Source:ZFIN;Acc:ZDB-GENE-060503-193]	36	50.6667	1.40741	0.0478986
ENSDART00000104806.4	ENSDART00000104806	ENSDARG00000071048	WISP3	WNT1 inducible signaling pathway protein 3 [Source:ZFIN;Acc:ZDB-GENE-041001-86]	307.667	432	1.40412	0.00414484
ENSDART00000159088.1	ENSDART00000159088	ENSDARG00000102583	IL4R.1	interleukin 4 receptor, tandem duplicate 1 [Source:ZFIN;Acc:ZDB-GENE-050227-5]	86.6667	121.667	1.40385	0.0418463
ENSDART00000142145.1	ENSDART00000142145	ENSDARG00000013227	GLULC	glutamate-ammonia ligase (glutamine synthase) c [Source:ZFIN;Acc:ZDB-GENE-060929-540]	78.6667	110.333	1.40254	0.0201844
ENSDART00000154351.3	ENSDART00000154351	ENSDARG00000060243	ENOX1	ecto-NOX disulfide-thiol exchanger 1 [Source:ZFIN;Acc:ZDB-GENE-081104-328]	89	124.333	1.397	0.0210328
ENSDART00000135031.2	ENSDART00000135031	ENSDARG00000094152	SI:DKEY-27D5.5	si:dkey-27d5.5 [Source:ZFIN;Acc:ZDB-GENE-141216-32]	61.6667	86	1.39459	0.0365975
ENSDART00000079248.5	ENSDART00000079248	ENSDARG00000056719	SLC6A19B	solute carrier family 6 (neutral amino acid transporter), member 19b [Source:ZFIN;Acc:ZDB-GENE-030131-4755]	82	114.333	1.39431	0.0477793
ENSDART00000168858.1	ENSDART00000168858	ENSDARG00000099726	CR847936.1	N/A	362	503	1.3895	0.0225922
ENSDART00000159199.1	ENSDART00000159199	ENSDARG00000069363	ZGC:153142	zgc:153142 [Source:ZFIN;Acc:ZDB-GENE-061013-507]	59.6667	82.6667	1.38547	0.0421921
ENSDART00000160529.1	ENSDART00000160529	ENSDARG00000074052	SI:CH211-281G13.5	si:ch211-281g13.5 [Source:ZFIN;Acc:ZDB-GENE-090311-7]	986.333	1355.67	1.37445	0.0291965
ENSDART00000035096.5	ENSDART00000035096	ENSDARG00000019949	SERPINH1B	serpin peptidase inhibitor, clade H (heat shock protein 47), member 1b [Source:ZFIN;Acc:ZDB-GENE-990415-93]	390.667	532	1.36177	0.0367889
ENSDART00000168879.1	ENSDART00000168879	ENSDARG00000102800	CABZ01081752.2	N/A	63	85.3333	1.3545	0.0370919
ENSDART00000048438.5	ENSDART00000048438	ENSDARG00000034988	ASB4	ankyrin repeat and SOCS box containing 4 [Source:ZFIN;Acc:ZDB-GENE-050417-100]	60.3333	81.6667	1.35359	0.0379772
ENSDART00000067332.4	ENSDART00000067332	ENSDARG00000045808	RLBP1B	retinaldehyde binding protein 1b [Source:ZFIN;Acc:ZDB-GENE-040426-1870]	153.667	208	1.35358	0.049301
ENSDART00000144061.2	ENSDART00000144061	ENSDARG00000058873	PTPDC1B	protein tyrosine phosphatase domain containing 1b [Source:ZFIN;Acc:ZDB-GENE-090312-138]	189.667	254.667	1.34271	0.0318624
ENSDART00000025196.7	ENSDART00000025196	ENSDARG00000003219	BIN2A	bridging integrator 2a [Source:ZFIN;Acc:ZDB-GENE-041114-126]	219.667	294.667	1.34143	0.0309867
ENSDART00000161032.1	ENSDART00000161032	ENSDARG00000104318	SI:DKEY-9I5.2	si:dkey-9i5.2 [Source:ZFIN;Acc:ZDB-GENE-110914-61]	261.667	349	1.33376	0.0470964
ENSDART00000173629.1	ENSDART00000173629	ENSDARG00000006878	PHF21AA	PHD finger protein 21Aa [Source:ZFIN;Acc:ZDB-GENE-050208-99]	122.667	163	1.3288	0.0353525
ENSDART00000015923.6	ENSDART00000015923	ENSDARG00000005814	KLHL10A	kelch-like family member 10a [Source:ZFIN;Acc:ZDB-GENE-131015-1]	444.667	590	1.32684	0.00181462
ENSDART00000031992.6	ENSDART00000031992	ENSDARG00000021521	RGS14A	regulator of G protein signaling 14a [Source:ZFIN;Acc:ZDB-GENE-030131-5579]	152	201.333	1.32456	0.0120581
ENSDART00000169675.1	ENSDART00000169675	ENSDARG00000098336	CU138548.2	N/A	496	656.667	1.32392	0.0197075
ENSDART00000115394.3	ENSDART00000115394	ENSDARG00000079187	TBX19	T-box 19 [Source:ZFIN;Acc:ZDB-GENE-110411-5]	168.333	221	1.31287	0.0234283
ENSDART00000160194.1	ENSDART00000160194	ENSDARG00000105094	CR847936.7	N/A	513	671.667	1.30929	0.0392577
ENSDART00000034883.8	ENSDART00000034883	ENSDARG00000022895	MCF2A	MCF.2 cell line derived transforming sequence a [Source:ZFIN;Acc:ZDB-GENE-030616-52]	175.667	229.333	1.3055	0.0464895
ENSDART00000147563.1	ENSDART00000147563	ENSDARG00000079753	KIZ	kizuna centrosomal protein [Source:ZFIN;Acc:ZDB-GENE-070615-4]	207.667	270	1.30016	0.0144596
ENSDART00000126518.2	ENSDART00000126518	ENSDARG00000008487	DMD	dystrophin [Source:ZFIN;Acc:ZDB-GENE-010426-1]	67	87	1.29851	0.0474675
ENSDART00000066986.5	ENSDART00000066986	ENSDARG00000045552	SI:DKEY-202B22.6	si:dkey-202b22.6 [Source:ZFIN;Acc:ZDB-GENE-041210-176]	207.667	266.667	1.28411	0.0231404
ENSDART00000158011.1	ENSDART00000158011	ENSDARG00000101816	COL5A3B	collagen, type V, alpha 3b [Source:ZFIN;Acc:ZDB-GENE-110728-4]	2433	3114.33	1.28004	0.0249744
ENSDART00000168802.1	ENSDART00000168802	ENSDARG00000104546	CR847936.6	N/A	537.333	682.333	1.26985	0.0205523
ENSDART00000060184.5	ENSDART00000060184	ENSDARG00000041078	CHKA	choline kinase alpha [Source:ZFIN;Acc:ZDB-GENE-050208-149]	785.667	996.333	1.26814	0.0287709
ENSDART00000066053.6	ENSDART00000066053	ENSDARG00000044938	CBX2	chromobox homolog 2 (Drosophila Pc class) [Source:ZFIN;Acc:ZDB-GENE-030131-5502]	272.333	342	1.25581	0.0389061
ENSDART00000103323.4	ENSDART00000103323	ENSDARG00000070424	CU138548.1	N/A	541	678.667	1.25447	0.039996
ENSDART00000159024.1	ENSDART00000159024	ENSDARG00000099138	BTR29	bloodthirsty-related gene family, member 29 [Source:ZFIN;Acc:ZDB-GENE-090512-2]	1394.33	1730.67	1.24121	0.0478713
ENSDART00000160026.1	ENSDART00000160026	ENSDARG00000099800	CR847936.2	N/A	256.667	317	1.23506	0.0406139
ENSDART00000174276.1	ENSDART00000174276	ENSDARG00000039960	ST7	suppression of tumorigenicity 7 [Source:ZFIN;Acc:ZDB-GENE-060421-2807]	334.333	412	1.2323	0.0172645
ENSDART00000022605.6	ENSDART00000022605	ENSDARG00000014506	TMEM126A	transmembrane protein 126A [Source:ZFIN;Acc:ZDB-GENE-040426-1770]	296	364.667	1.23198	0.0212634
ENSDART00000160408.1	ENSDART00000160408	ENSDARG00000102688	CU138548.6	N/A	498.667	612.667	1.22861	0.035086
ENSDART00000007726.9	ENSDART00000007726	ENSDARG00000002339	SGF29	SAGA complex associated factor 29 [Source:ZFIN;Acc:ZDB-GENE-041010-62]	532.333	652.667	1.22605	0.036859
ENSDART00000168309.1	ENSDART00000168309	ENSDARG00000104396	TRIM25	tripartite motif containing 25 [Source:ZFIN;Acc:ZDB-GENE-040426-797]	586.667	717.667	1.2233	0.0418071
ENSDART00000168839.1	ENSDART00000168839	ENSDARG00000041107	CFTR	cystic fibrosis transmembrane conductance regulator (ATP-binding cassette sub-family C, member 7) [Source:ZFIN;Acc:ZDB-GENE-050517-20]	631.333	771.667	1.22228	0.0368577
ENSDART00000022841.7	ENSDART00000022841	ENSDARG00000019715	METAP1D	methionyl aminopeptidase type 1D (mitochondrial) [Source:ZFIN;Acc:ZDB-GENE-050522-71]	280.667	341.667	1.21734	0.0438352
ENSDART00000110490.3	ENSDART00000110490	ENSDARG00000073936	BX511021.2	N/A	441.667	530.667	1.20151	0.0294763
ENSDART00000176556.1	ENSDART00000176556	ENSDARG00000092849	SI:CH73-92E7.4	si:ch73-92e7.4 [Source:ZFIN;Acc:ZDB-GENE-081031-48]	133.333	160	1.2	0.049408
ENSDART00000168334.1	ENSDART00000168334	ENSDARG00000076623	COL14A1B	collagen, type XIV, alpha 1b [Source:ZFIN;Acc:ZDB-GENE-030131-1985]	540	642.333	1.18951	0.0374973
ENSDART00000141809.1	ENSDART00000141809	ENSDARG00000005980	SFSWAP	splicing factor, suppressor of white-apricot family [Source:ZFIN;Acc:ZDB-GENE-040426-931]	307	364.667	1.18784	0.0405054
ENSDART00000127428.3	ENSDART00000127428	ENSDARG00000087452	PELI3	pellino E3 ubiquitin protein ligase family member 3 [Source:ZFIN;Acc:ZDB-GENE-110304-4]	530	629.333	1.18742	0.0411509
ENSDART00000166807.1	ENSDART00000166807	ENSDARG00000007863	TRA2A	transformer 2 alpha homolog [Source:ZFIN;Acc:ZDB-GENE-040426-1391]	743	880.333	1.18484	0.0427998
ENSDART00000161391.1	ENSDART00000161391	ENSDARG00000089563	CU633855.1	N/A	256	296.333	1.15755	0.031159
ENSDART00000127072.2	ENSDART00000127072	ENSDARG00000088398	TMEM107L	transmembrane protein 107 like [Source:ZFIN;Acc:ZDB-GENE-090313-269]	311.333	356	1.14347	0.0358186
ENSDART00000143127.2	ENSDART00000143127	ENSDARG00000068366	SI:DKEY-154P10.3	si:dkey-154p10.3 [Source:ZFIN;Acc:ZDB-GENE-070912-380]	1071.33	1198.33	1.11854	0.032124
ENSDART00000162188.2	ENSDART00000162188	ENSDARG00000101631	ETFA	electron transfer flavoprotein alpha subunit [Source:HGNC Symbol;Acc:HGNC:3481]	654.333	394	-1.66074	0.0437976
ENSDART00000122579.2	ENSDART00000122579	ENSDARG00000089075	SI:CH73-173P19.1	si:ch73-173p19.1 [Source:ZFIN;Acc:ZDB-GENE-130530-952]	1581.33	951	-1.66281	0.0412317
ENSDART00000163796.1	ENSDART00000163796	ENSDARG00000019765	LUC7L2	zgc:158803 [Source:ZFIN;Acc:ZDB-GENE-070424-15]	1006.33	595.667	-1.68942	0.0465362
ENSDART00000047471.7	ENSDART00000047471	ENSDARG00000030913	CLUHA	clustered mitochondria (cluA/CLU1) homolog a [Source:ZFIN;Acc:ZDB-GENE-061103-457]	1112.67	648	-1.71708	0.0485721
ENSDART00000104519.5	ENSDART00000104519	ENSDARG00000022712	STAT3	signal transducer and activator of transcription 3 (acute-phase response factor) [Source:ZFIN;Acc:ZDB-GENE-980526-68]	336.667	191	-1.76265	0.0475132
ENSDART00000150156.2	ENSDART00000150156	ENSDARG00000079766	TAP1	transporter 1, ATP-binding cassette, sub-family B (MDR/TAP) [Source:ZFIN;Acc:ZDB-GENE-050517-43]	1319.67	745	-1.77136	0.0436757
ENSDART00000083431.6	ENSDART00000083431	ENSDARG00000059770	CPT1AA	carnitine palmitoyltransferase 1Aa (liver) [Source:ZFIN;Acc:ZDB-GENE-060503-925]	255.333	143.667	-1.77726	0.0473509
ENSDART00000121476.2	ENSDART00000121476	ENSDARG00000016375	ASNS	asparagine synthetase [Source:ZFIN;Acc:ZDB-GENE-040426-1091]	211.333	118.667	-1.7809	0.0471628
ENSDART00000135540.1	ENSDART00000135540	ENSDARG00000068965	NRIP1A	nuclear receptor interacting protein 1a [Source:ZFIN;Acc:ZDB-GENE-040723-8]	122.333	66.6667	-1.835	0.0499514
ENSDART00000037553.6	ENSDART00000037553	ENSDARG00000008457	FAAH2A	fatty acid amide hydrolase 2a [Source:ZFIN;Acc:ZDB-GENE-040718-453]	1115.33	605	-1.84353	0.042619
ENSDART00000109138.3	ENSDART00000109138	ENSDARG00000075121	HBEGFA	heparin-binding EGF-like growth factor a [Source:ZFIN;Acc:ZDB-GENE-080204-119]	481.333	260	-1.85128	0.025271
ENSDART00000151921.2	ENSDART00000151921	ENSDARG00000015566	DNMT3AB	DNA (cytosine-5-)-methyltransferase 3 alpha b [Source:ZFIN;Acc:ZDB-GENE-050314-3]	310	166.667	-1.86	0.0284072
ENSDART00000089596.5	ENSDART00000089596	ENSDARG00000062168	TMEM168B	transmembrane protein 168b [Source:ZFIN;Acc:ZDB-GENE-090406-3]	180.667	97	-1.86254	0.048305
ENSDART00000002714.6	ENSDART00000002714	ENSDARG00000011049	SLC17A9B	solute carrier family 17 (vesicular nucleotide transporter), member 9b [Source:ZFIN;Acc:ZDB-GENE-040718-380]	401	215	-1.86512	0.0399307
ENSDART00000170010.1	ENSDART00000170010	ENSDARG00000094284	SI:DKEY-58F10.10	si:dkey-58f10.10 [Source:ZFIN;Acc:ZDB-GENE-060526-312]	265	142	-1.8662	0.0398129
ENSDART00000164160.1	ENSDART00000164160	ENSDARG00000044142	ACSS1	acyl-CoA synthetase short-chain family member 1 [Source:ZFIN;Acc:ZDB-GENE-050320-139]	402.667	215.667	-1.86708	0.0468246
ENSDART00000138243.2	ENSDART00000138243	ENSDARG00000014430	RABGEF1	RAB guanine nucleotide exchange factor (GEF) 1 [Source:ZFIN;Acc:ZDB-GENE-040426-1486]	237.667	126.667	-1.87632	0.0278943
ENSDART00000171895.1	ENSDART00000171895	ENSDARG00000078604	TBC1D10B	TBC1 domain family, member 10b [Source:ZFIN;Acc:ZDB-GENE-030131-7754]	261.667	139.333	-1.87799	0.0322459
ENSDART00000016658.6	ENSDART00000016658	ENSDARG00000014572	CHPT1	choline phosphotransferase 1 [Source:ZFIN;Acc:ZDB-GENE-030131-1325]	462	243.667	-1.89603	0.0401759
ENSDART00000063135.5	ENSDART00000063135	ENSDARG00000043003	PCYT2	phosphate cytidylyltransferase 2, ethanolamine [Source:ZFIN;Acc:ZDB-GENE-041010-132]	597.333	313.667	-1.90436	0.0241835
ENSDART00000091237.5	ENSDART00000091237	ENSDARG00000062820	IRGF3	immunity-related GTPase family, f3 [Source:ZFIN;Acc:ZDB-GENE-051212-6]	674.667	353.667	-1.90763	0.0385877
ENSDART00000129458.2	ENSDART00000129458	ENSDARG00000087657	FASN	fatty acid synthase [Source:ZFIN;Acc:ZDB-GENE-030131-7802]	1735	908.333	-1.91009	0.0416928
ENSDART00000149382.3	ENSDART00000149382	ENSDARG00000013050	ABCC12	ATP-binding cassette, sub-family C (CFTR/MRP), member 12 [Source:ZFIN;Acc:ZDB-GENE-050517-25]	514.667	266	-1.93484	0.0390113
ENSDART00000033761.7	ENSDART00000033761	ENSDARG00000036415	GLB1	galactosidase, beta 1 [Source:ZFIN;Acc:ZDB-GENE-050410-9]	263	135	-1.94815	0.0356981
ENSDART00000141799.1	ENSDART00000141799	ENSDARG00000074170	FBXO4	F-box protein 4 [Source:ZFIN;Acc:ZDB-GENE-081104-415]	151	76.3333	-1.97817	0.0294664
ENSDART00000157580.1	ENSDART00000157580	ENSDARG00000102827	UBFD1	ubiquitin family domain containing 1 [Source:ZFIN;Acc:ZDB-GENE-050506-90]	180.333	91	-1.98168	0.0272971
ENSDART00000089379.5	ENSDART00000089379	ENSDARG00000062101	IFFO2A	intermediate filament family orphan 2a [Source:ZFIN;Acc:ZDB-GENE-090313-342]	123	62	-1.98387	0.0465395
ENSDART00000161720.1	ENSDART00000161720	ENSDARG00000104414	SHMT2	serine hydroxymethyltransferase 2 (mitochondrial) [Source:ZFIN;Acc:ZDB-GENE-071213-1]	217.667	109.333	-1.99085	0.0383567
ENSDART00000103940.3	ENSDART00000103940	ENSDARG00000036065	MGAT1B	mannosyl (alpha-1,3-)-glycoprotein beta-1,2-N-acetylglucosaminyltransferase b [Source:ZFIN;Acc:ZDB-GENE-061103-589]	173.333	87	-1.99234	0.0286136
ENSDART00000147769.1	ENSDART00000147769	ENSDARG00000091996	SI:CH211-117M20.5	si:ch211-117m20.5 [Source:ZFIN;Acc:ZDB-GENE-030131-12]	247.667	123	-2.01355	0.0171723
ENSDART00000159748.1	ENSDART00000159748	ENSDARG00000104702	CAT	catalase [Source:ZFIN;Acc:ZDB-GENE-000210-20]	822.667	406.333	-2.02461	0.04563
ENSDART00000074553.5	ENSDART00000074553	ENSDARG00000052658	PPTC7B	PTC7 protein phosphatase homolog b [Source:ZFIN;Acc:ZDB-GENE-081105-111]	249.333	123	-2.0271	0.00997845
ENSDART00000143628.1	ENSDART00000143628	ENSDARG00000070454	PLA2G12A	phospholipase A2, group XIIA [Source:ZFIN;Acc:ZDB-GENE-070410-18]	121	59.6667	-2.02793	0.0351569
ENSDART00000143901.3	ENSDART00000143901	ENSDARG00000028163	PRG4B	proteoglycan 4b [Source:ZFIN;Acc:ZDB-GENE-041014-324]	1126.33	555	-2.02943	0.0319203
ENSDART00000165290.1	ENSDART00000165290	ENSDARG00000098589	CYB5A	cytochrome b5 type A (microsomal) [Source:ZFIN;Acc:ZDB-GENE-040426-2148]	360.333	177.333	-2.03195	0.0267596
ENSDART00000144676.1	ENSDART00000144676	ENSDARG00000093748	SI:CH211-217K17.11	si:ch211-217k17.11 [Source:ZFIN;Acc:ZDB-GENE-030131-8636]	5615	2761.33	-2.03344	0.0352624
ENSDART00000129978.2	ENSDART00000129978	ENSDARG00000089390	PNPLA2	patatin-like phospholipase domain containing 2 [Source:ZFIN;Acc:ZDB-GENE-120913-3]	319.667	157	-2.03609	0.048463
ENSDART00000169295.2	ENSDART00000169295	ENSDARG00000103915	ERO1B	endoplasmic reticulum oxidoreductase beta [Source:ZFIN;Acc:ZDB-GENE-060929-744]	301.333	147	-2.04989	0.0046351
ENSDART00000077080.5	ENSDART00000077080	ENSDARG00000054814	N/A	N/A	92	44.6667	-2.0597	0.0290309
ENSDART00000170357.1	ENSDART00000170357	ENSDARG00000100599	C1S	complement component 1, s subcomponent [Source:ZFIN;Acc:ZDB-GENE-030131-1232]	2251.33	1091.67	-2.06229	0.0349827
ENSDART00000166508.1	ENSDART00000166508	ENSDARG00000101062	FDFT1	farnesyl-diphosphate farnesyltransferase 1 [Source:ZFIN;Acc:ZDB-GENE-081104-242]	478	231.667	-2.06331	0.0350287
ENSDART00000098842.4	ENSDART00000098842	ENSDARG00000035872	HSD17B12B	hydroxysteroid (17-beta) dehydrogenase 12b [Source:ZFIN;Acc:ZDB-GENE-030131-1346]	215.333	104.333	-2.0639	0.0179257
ENSDART00000173505.1	ENSDART00000173505	ENSDARG00000056722	CD99L2	CD99 molecule-like 2 [Source:ZFIN;Acc:ZDB-GENE-030131-1986]	85	41	-2.07317	0.0334859
ENSDART00000124110.2	ENSDART00000124110	ENSDARG00000090301	USP48	ubiquitin specific peptidase 48 [Source:ZFIN;Acc:ZDB-GENE-050522-197]	162.667	78.3333	-2.0766	0.00784298
ENSDART00000150583.1	ENSDART00000150583	ENSDARG00000058366	SI:DKEY-222F8.3	si:dkey-222f8.3 [Source:ZFIN;Acc:ZDB-GENE-030131-3658]	124	59.6667	-2.07821	0.041742
ENSDART00000163348.1	ENSDART00000163348	ENSDARG00000099558	NPC1L1	NPC1 like intracellular cholesterol transporter 1 [Source:HGNC Symbol;Acc:HGNC:7898]	184.333	88.3333	-2.08679	0.0274971
ENSDART00000113142.4	ENSDART00000113142	ENSDARG00000079378	PHLDB1B	pleckstrin homology-like domain, family B, member 1b [Source:ZFIN;Acc:ZDB-GENE-121114-8]	185.333	88.6667	-2.09023	0.0147787
ENSDART00000172943.1	ENSDART00000172943	ENSDARG00000094901	ABCC6B.2	ATP-binding cassette, sub-family C (CFTR/MRP), member 6b, tandem duplicate 2 [Source:ZFIN;Acc:ZDB-GENE-110208-2]	60.6667	29	-2.09195	0.0426869
ENSDART00000049425.6	ENSDART00000049425	ENSDARG00000005675	SEC61A1L	Sec61 translocon alpha 1 subunit, like [Source:ZFIN;Acc:ZDB-GENE-021016-2]	1186.67	563.333	-2.10651	0.0148848
ENSDART00000113237.3	ENSDART00000113237	ENSDARG00000074740	ARHGAP18	Rho GTPase activating protein 18 [Source:HGNC Symbol;Acc:HGNC:21035]	203.333	96.3333	-2.11073	0.027759
ENSDART00000160742.1	ENSDART00000160742	ENSDARG00000096867	CLMN	calmin [Source:ZFIN;Acc:ZDB-GENE-131127-546]	209.667	99	-2.11785	0.0491966
ENSDART00000045253.7	ENSDART00000045253	ENSDARG00000026376	ACO1	aconitase 1, soluble [Source:ZFIN;Acc:ZDB-GENE-031118-76]	1070.33	505	-2.11947	0.00378306
ENSDART00000164191.1	ENSDART00000164191	ENSDARG00000105000	C2CD2	C2 calcium-dependent domain containing 2 [Source:ZFIN;Acc:ZDB-GENE-110728-1]	365.667	172	-2.12597	0.027505
ENSDART00000163680.1	ENSDART00000163680	ENSDARG00000103025	HMGCS1	3-hydroxy-3-methylglutaryl-CoA synthase 1 (soluble) [Source:ZFIN;Acc:ZDB-GENE-040426-1042]	598.333	281.333	-2.12678	0.0178542
ENSDART00000111753.2	ENSDART00000111753	ENSDARG00000012450	VMP1	vacuole membrane protein 1 [Source:ZFIN;Acc:ZDB-GENE-030131-8733]	72.3333	34	-2.12745	0.0393697
ENSDART00000056767.5	ENSDART00000056767	ENSDARG00000038881	ACAA2	acetyl-CoA acyltransferase 2 [Source:ZFIN;Acc:ZDB-GENE-040426-1996]	1124	526.333	-2.13553	0.0358075
ENSDART00000113607.2	ENSDART00000113607	ENSDARG00000053877	CPDB	carboxypeptidase D, b [Source:ZFIN;Acc:ZDB-GENE-060929-1270]	113.333	53	-2.13836	0.014895
ENSDART00000175683.1	ENSDART00000175683	ENSDARG00000016536	NPAS2	neuronal PAS domain protein 2 [Source:ZFIN;Acc:ZDB-GENE-030408-3]	55.6667	26	-2.14103	0.0467831
ENSDART00000167532.1	ENSDART00000167532	ENSDARG00000060518	PCSK5B	proprotein convertase subtilisin/kexin type 5b [Source:ZFIN;Acc:ZDB-GENE-070822-7]	115	53.6667	-2.14286	0.0177184
ENSDART00000169175.1	ENSDART00000169175	ENSDARG00000098420	SNTA1	syntrophin alpha 1 [Source:HGNC Symbol;Acc:HGNC:11167]	62.3333	29	-2.14943	0.0404803
ENSDART00000159474.1	ENSDART00000159474	ENSDARG00000098080	GNL2	guanine nucleotide binding protein-like 2 (nucleolar) [Source:ZFIN;Acc:ZDB-GENE-040426-2317]	129.667	60	-2.16111	0.0411128
ENSDART00000112874.5	ENSDART00000112874	ENSDARG00000078214	MYBBP1A	MYB binding protein (P160) 1a [Source:ZFIN;Acc:ZDB-GENE-030131-9864]	547.333	253	-2.16337	0.0120858
ENSDART00000013167.7	ENSDART00000013167	ENSDARG00000018600	RETSAT	retinol saturase (all-trans-retinol 13,14-reductase) [Source:ZFIN;Acc:ZDB-GENE-050320-11]	1105.67	510.667	-2.16514	0.0343269
ENSDART00000067762.6	ENSDART00000067762	ENSDARG00000036863	MYO1D	myosin ID [Source:HGNC Symbol;Acc:HGNC:7598]	265.667	122.667	-2.16576	0.00667073
ENSDART00000129511.2	ENSDART00000129511	ENSDARG00000014891	ROBO2	roundabout, axon guidance receptor, homolog 2 (Drosophila) [Source:ZFIN;Acc:ZDB-GENE-001019-1]	202.667	92.6667	-2.18705	0.0337458
ENSDART00000173796.1	ENSDART00000173796	ENSDARG00000067794	CABZ01076234.2	cabz01076234.2 [Source:ZFIN;Acc:ZDB-GENE-160727-2]	187	84.6667	-2.20866	0.0184427
ENSDART00000002866.8	ENSDART00000002866	ENSDARG00000016695	P2RX1	purinergic receptor P2X, ligand-gated ion channel, 1 [Source:ZFIN;Acc:ZDB-GENE-030319-1]	301.333	135.667	-2.22113	0.0114544
ENSDART00000134433.1	ENSDART00000134433	ENSDARG00000074850	IL12RB2L	interleukin 12 receptor, beta 2a, like [Source:ZFIN;Acc:ZDB-GENE-080107-6]	129.667	58.3333	-2.22286	0.0193086
ENSDART00000134200.1	ENSDART00000134200	ENSDARG00000070055	ARFIP1	ADP-ribosylation factor interacting protein 1 (arfaptin 1) [Source:ZFIN;Acc:ZDB-GENE-040426-2690]	94.3333	42.3333	-2.22835	0.0307234
ENSDART00000160885.1	ENSDART00000160885	ENSDARG00000098408	STBD1	starch binding domain 1 [Source:ZFIN;Acc:ZDB-GENE-120817-2]	108	48.3333	-2.23448	0.025202
ENSDART00000173659.1	ENSDART00000173659	ENSDARG00000105584	SLC8B1	solute carrier family 8 (sodium/lithium/calcium exchanger), member B1 [Source:ZFIN;Acc:ZDB-GENE-130530-900]	70.3333	31.3333	-2.24468	0.0437603
ENSDART00000165625.1	ENSDART00000165625	ENSDARG00000008372	SPRED2B	sprouty-related, EVH1 domain containing 2b [Source:ZFIN;Acc:ZDB-GENE-040426-2342]	116.333	51.6667	-2.25161	0.01892
ENSDART00000126566.2	ENSDART00000126566	ENSDARG00000078856	SLC22A23	solute carrier family 22, member 23 [Source:ZFIN;Acc:ZDB-GENE-030131-3564]	230.667	101.667	-2.26885	0.00467608
ENSDART00000065600.4	ENSDART00000065600	ENSDARG00000044642	SC5D	sterol-C5-desaturase [Source:ZFIN;Acc:ZDB-GENE-040912-56]	314	138.333	-2.26988	0.0152718
ENSDART00000086047.6	ENSDART00000086047	ENSDARG00000060796	SLC20A2	solute carrier family 20 (phosphate transporter), member 2 [Source:ZFIN;Acc:ZDB-GENE-060929-828]	151.333	66.6667	-2.27	0.00962502
ENSDART00000172779.1	ENSDART00000172779	ENSDARG00000021059	ALAS1	aminolevulinate, delta-, synthase 1 [Source:ZFIN;Acc:ZDB-GENE-001229-2]	713.333	313.667	-2.27418	0.0450984
ENSDART00000160124.1	ENSDART00000160124	ENSDARG00000100753	CABZ01076275.1	N/A	679	298.333	-2.27598	0.00341262
ENSDART00000167664.1	ENSDART00000167664	ENSDARG00000061687	ATXN1A	ataxin 1a [Source:ZFIN;Acc:ZDB-GENE-060503-759]	70.6667	31	-2.27957	0.0398137
ENSDART00000152497.1	ENSDART00000152497	ENSDARG00000013542	LPGAT1	lysophosphatidylglycerol acyltransferase 1 [Source:ZFIN;Acc:ZDB-GENE-030131-2906]	51	22.3333	-2.28358	0.0389021
ENSDART00000165232.1	ENSDART00000165232	ENSDARG00000071044	ZGC:153722	zgc:153722 [Source:ZFIN;Acc:ZDB-GENE-060929-84]	99	43.3333	-2.28462	0.0219259
ENSDART00000168194.1	ENSDART00000168194	ENSDARG00000007943	GABPB2A	GA binding protein transcription factor, beta subunit 2a [Source:ZFIN;Acc:ZDB-GENE-030131-5733]	65.6667	28.6667	-2.2907	0.0454557
ENSDART00000131030.2	ENSDART00000131030	ENSDARG00000003068	GORASP1A	golgi reassembly stacking protein 1a [Source:ZFIN;Acc:ZDB-GENE-030826-23]	101	44	-2.29545	0.032899
ENSDART00000142732.2	ENSDART00000142732	ENSDARG00000062418	TTL	tubulin tyrosine ligase [Source:ZFIN;Acc:ZDB-GENE-060929-608]	110	47.6667	-2.30769	0.0269617
ENSDART00000105646.5	ENSDART00000105646	ENSDARG00000071449	FAM234A	family with sequence similarity 234, member A [Source:ZFIN;Acc:ZDB-GENE-091204-17]	200	86.6667	-2.30769	0.038195
ENSDART00000040066.6	ENSDART00000040066	ENSDARG00000010070	ADAM9	ADAM metallopeptidase domain 9 [Source:ZFIN;Acc:ZDB-GENE-040912-127]	92.3333	40	-2.30833	0.0201544
ENSDART00000159318.1	ENSDART00000159318	ENSDARG00000019581	USO1	USO1 vesicle transport factor [Source:ZFIN;Acc:ZDB-GENE-040426-688]	160.333	69.3333	-2.3125	0.0128286
ENSDART00000159205.1	ENSDART00000159205	ENSDARG00000099962	PHLPP2	PH domain and leucine rich repeat protein phosphatase 2 [Source:HGNC Symbol;Acc:HGNC:29149]	69.6667	30	-2.32222	0.0196976
ENSDART00000062073.4	ENSDART00000062073	ENSDARG00000042329	N/A	N/A	268.667	115.667	-2.32277	0.0126025
ENSDART00000057519.6	ENSDART00000057519	ENSDARG00000039356	ZGC:194209	zgc:194209 [Source:ZFIN;Acc:ZDB-GENE-081022-75]	66	28.3333	-2.32941	0.0303754
ENSDART00000152603.1	ENSDART00000152603	ENSDARG00000062562	EGLN2	egl-9 family hypoxia-inducible factor 2 [Source:ZFIN;Acc:ZDB-GENE-060503-757]	135.333	58	-2.33333	0.0118039
ENSDART00000165272.1	ENSDART00000165272	ENSDARG00000103226	DHCR7	7-dehydrocholesterol reductase [Source:ZFIN;Acc:ZDB-GENE-030912-9]	369.667	158.333	-2.33474	0.00884067
ENSDART00000164202.1	ENSDART00000164202	ENSDARG00000099758	IGF2BP2B	insulin-like growth factor 2 mRNA binding protein 2b [Source:ZFIN;Acc:ZDB-GENE-060503-536]	51	21.6667	-2.35385	0.0280742
ENSDART00000170809.1	ENSDART00000170809	ENSDARG00000061684	SLC25A17	solute carrier family 25 (mitochondrial carrier; peroxisomal membrane protein), member 17 [Source:ZFIN;Acc:ZDB-GENE-070620-4]	41.6667	17.6667	-2.35849	0.0448209
ENSDART00000157854.1	ENSDART00000157854	ENSDARG00000104267	POSTNB	periostin, osteoblast specific factor b [Source:ZFIN;Acc:ZDB-GENE-030131-9120]	172.333	73	-2.36073	0.0184766
ENSDART00000176020.1	ENSDART00000176020	ENSDARG00000063563	CREB3L2	cAMP responsive element binding protein 3-like 2 [Source:ZFIN;Acc:ZDB-GENE-070112-1542]	179	75.6667	-2.36564	0.0425467
ENSDART00000124349.2	ENSDART00000124349	ENSDARG00000054060	POF1B	premature ovarian failure, 1B [Source:ZFIN;Acc:ZDB-GENE-030131-4287]	105.667	44.6667	-2.36567	0.00644641
ENSDART00000062551.4	ENSDART00000062551	ENSDARG00000042641	CYP51	cytochrome P450, family 51 [Source:ZFIN;Acc:ZDB-GENE-040625-2]	2768	1169	-2.36784	0.0146492
ENSDART00000130264.2	ENSDART00000130264	ENSDARG00000091161	RPZ	rapunzel [Source:ZFIN;Acc:ZDB-GENE-070117-651]	182	76.3333	-2.38428	0.0413553
ENSDART00000165721.1	ENSDART00000165721	ENSDARG00000076487	HAAO	3-hydroxyanthranilate 3,4-dioxygenase [Source:ZFIN;Acc:ZDB-GENE-041114-89]	105	44	-2.38636	0.0289005
ENSDART00000040357.7	ENSDART00000040357	ENSDARG00000054290	ACIN1A	apoptotic chromatin condensation inducer 1a [Source:ZFIN;Acc:ZDB-GENE-030616-583]	478.333	200.333	-2.38769	0.015691
ENSDART00000170270.1	ENSDART00000170270	ENSDARG00000063268	SLC35G1	solute carrier family 35 member G1 [Source:HGNC Symbol;Acc:HGNC:26607]	54.3333	22.6667	-2.39706	0.0279578
ENSDART00000090221.6	ENSDART00000090221	ENSDARG00000062390	CDC42EP5	CDC42 effector protein (Rho GTPase binding) 5 [Source:ZFIN;Acc:ZDB-GENE-030131-5813]	189.667	79	-2.40084	0.0333053
ENSDART00000067030.5	ENSDART00000067030	ENSDARG00000027310	LSP1	lymphocyte-specific protein 1 [Source:ZFIN;Acc:ZDB-GENE-131127-171]	833.333	346	-2.40848	0.0383055
ENSDART00000081657.5	ENSDART00000081657	ENSDARG00000058731	SLC2A6	solute carrier family 2 (facilitated glucose transporter), member 6 [Source:ZFIN;Acc:ZDB-GENE-081104-301]	302.333	125.333	-2.41223	0.0467226
ENSDART00000171252.1	ENSDART00000171252	ENSDARG00000102200	MAN2A1	mannosidase, alpha, class 2A, member 1 [Source:ZFIN;Acc:ZDB-GENE-060526-31]	177	73.3333	-2.41364	0.0309916
ENSDART00000143921.1	ENSDART00000143921	ENSDARG00000045411	ACAD11	acyl-CoA dehydrogenase family, member 11 [Source:ZFIN;Acc:ZDB-GENE-040426-814]	76.6667	31.6667	-2.42105	0.0271448
ENSDART00000097460.4	ENSDART00000097460	ENSDARG00000052734	HMGCRA	3-hydroxy-3-methylglutaryl-CoA reductase a [Source:ZFIN;Acc:ZDB-GENE-040401-2]	800.667	330	-2.42626	0.0233726
ENSDART00000078277.4	ENSDART00000078277	ENSDARG00000055876	MSMO1	methylsterol monooxygenase 1 [Source:ZFIN;Acc:ZDB-GENE-040426-2670]	1092.33	448	-2.43824	0.0151232
ENSDART00000114854.2	ENSDART00000114854	ENSDARG00000015989	ZDHHC16B	zinc finger, DHHC-type containing 16b [Source:ZFIN;Acc:ZDB-GENE-040426-1301]	61	25	-2.44	0.0257666
ENSDART00000105933.3	ENSDART00000105933	ENSDARG00000071586	TGFBI	transforming growth factor, beta-induced [Source:ZFIN;Acc:ZDB-GENE-030131-73]	242.333	99	-2.44781	0.00514478
ENSDART00000167747.2	ENSDART00000167747	ENSDARG00000104654	LEAP2	liver-expressed antimicrobial peptide 2 [Source:ZFIN;Acc:ZDB-GENE-081022-131]	115	46.6667	-2.46429	0.0468621
ENSDART00000076575.5	ENSDART00000076575	ENSDARG00000054389	RHOF	ras homolog family member F [Source:ZFIN;Acc:ZDB-GENE-050522-280]	51.3333	20.6667	-2.48387	0.0305948
ENSDART00000149642.1	ENSDART00000149642	ENSDARG00000060153	H6PD	hexose-6-phosphate dehydrogenase (glucose 1-dehydrogenase) [Source:ZFIN;Acc:ZDB-GENE-110408-60]	230.667	92.6667	-2.48921	0.0242661
ENSDART00000144983.2	ENSDART00000144983	ENSDARG00000025904	TECRB	trans-2,3-enoyl-CoA reductase b [Source:ZFIN;Acc:ZDB-GENE-030131-5154]	226	90.6667	-2.49265	0.0046221
ENSDART00000142377.1	ENSDART00000142377	ENSDARG00000078536	N/A	N/A	64.3333	25.6667	-2.50649	0.0342499
ENSDART00000135600.1	ENSDART00000135600	ENSDARG00000092667	SI:CH211-271E10.2	si:ch211-271e10.2 [Source:ZFIN;Acc:ZDB-GENE-060526-146]	279.333	111.333	-2.50898	0.00307881
ENSDART00000172015.1	ENSDART00000172015	ENSDARG00000099774	CYB5B	cytochrome b5 type B [Source:ZFIN;Acc:ZDB-GENE-040426-2614]	287.667	113.667	-2.53079	0.00360348
ENSDART00000140740.2	ENSDART00000140740	ENSDARG00000079345	SI:CH211-217K17.10	si:ch211-217k17.10 [Source:ZFIN;Acc:ZDB-GENE-030131-8827]	1180.33	466.333	-2.53109	0.0357799
ENSDART00000110994.4	ENSDART00000110994	ENSDARG00000079946	SQLEA	squalene epoxidase a [Source:ZFIN;Acc:ZDB-GENE-071004-98]	1273.33	503	-2.53148	0.00882041
ENSDART00000165134.1	ENSDART00000165134	ENSDARG00000067805	GGCX	gamma-glutamyl carboxylase [Source:ZFIN;Acc:ZDB-GENE-030826-27]	87	34.3333	-2.53398	0.0182066
ENSDART00000066168.5	ENSDART00000066168	ENSDARG00000025559	PEX11G	peroxisomal biogenesis factor 11 gamma [Source:ZFIN;Acc:ZDB-GENE-050913-79]	84.3333	33	-2.55556	0.0401857
ENSDART00000029343.8	ENSDART00000029343	ENSDARG00000025320	COL21A1	collagen, type XXI, alpha 1 [Source:ZFIN;Acc:ZDB-GENE-110607-3]	62.3333	24.3333	-2.56164	0.00979137
ENSDART00000157755.2	ENSDART00000157755	ENSDARG00000019549	CDS1	CDP-diacylglycerol synthase (phosphatidate cytidylyltransferase) 1 [Source:ZFIN;Acc:ZDB-GENE-070705-78]	90.6667	35.3333	-2.56604	0.022476
ENSDART00000135023.1	ENSDART00000135023	ENSDARG00000078401	LARP4AA	La ribonucleoprotein domain family, member 4Aa [Source:ZFIN;Acc:ZDB-GENE-090313-50]	61	23.6667	-2.57746	0.0145972
ENSDART00000161652.1	ENSDART00000161652	ENSDARG00000103743	SI:DKEYP-72E1.9	si:dkeyp-72e1.9 [Source:ZFIN;Acc:ZDB-GENE-120215-89]	40	15.3333	-2.6087	0.0436054
ENSDART00000053463.3	ENSDART00000053463	ENSDARG00000036820	MGLL	monoglyceride lipase [Source:ZFIN;Acc:ZDB-GENE-031006-9]	102.333	38.3333	-2.66957	0.0137382
ENSDART00000128450.2	ENSDART00000128450	ENSDARG00000015575	CYP3C1	cytochrome P450, family 3, subfamily c, polypeptide 1 [Source:ZFIN;Acc:ZDB-GENE-030131-3060]	75.6667	28.3333	-2.67059	0.0170532
ENSDART00000170209.1	ENSDART00000170209	ENSDARG00000099902	IL17RC	interleukin 17 receptor C [Source:ZFIN;Acc:ZDB-GENE-120111-3]	43.6667	16.3333	-2.67347	0.0345531
ENSDART00000103039.3	ENSDART00000103039	ENSDARG00000103858	ARF4A	ADP-ribosylation factor 4a [Source:ZFIN;Acc:ZDB-GENE-040801-109]	47.3333	17.6667	-2.67925	0.0107978
ENSDART00000143093.1	ENSDART00000143093	ENSDARG00000033320	SAR1AB	secretion associated, Ras related GTPase 1Ab [Source:ZFIN;Acc:ZDB-GENE-050417-437]	30.6667	11.3333	-2.70588	0.0302517
ENSDART00000171606.2	ENSDART00000171606	ENSDARG00000103713	CD248A	CD248 molecule, endosialin a [Source:ZFIN;Acc:ZDB-GENE-030131-2084]	322.333	117.333	-2.74716	0.00906754
ENSDART00000141212.2	ENSDART00000141212	ENSDARG00000033999	CYP26A1	cytochrome P450, family 26, subfamily A, polypeptide 1 [Source:ZFIN;Acc:ZDB-GENE-990415-44]	79	28.6667	-2.75581	0.0475079
ENSDART00000144009.1	ENSDART00000144009	ENSDARG00000017794	SDR16C5B	short chain dehydrogenase/reductase family 16C, member 5b [Source:ZFIN;Acc:ZDB-GENE-040426-2861]	201.667	73	-2.76256	0.0143781
ENSDART00000138959.1	ENSDART00000138959	ENSDARG00000042409	N/A	N/A	44.3333	16	-2.77083	0.0221762
ENSDART00000121859.2	ENSDART00000121859	ENSDARG00000090063	FA2H	fatty acid 2-hydroxylase [Source:ZFIN;Acc:ZDB-GENE-031219-4]	85.3333	30.6667	-2.78261	0.0185439
ENSDART00000151720.1	ENSDART00000151720	ENSDARG00000087508	SI:CH211-39I22.1	si:ch211-39i22.1 [Source:ZFIN;Acc:ZDB-GENE-120215-258]	630	225.667	-2.79173	0.0168275
ENSDART00000157762.2	ENSDART00000157762	ENSDARG00000098368	APLP1	amyloid beta (A4) precursor-like protein 1 [Source:ZFIN;Acc:ZDB-GENE-040319-1]	157.667	56.3333	-2.79882	0.0198146
ENSDART00000024084.6	ENSDART00000024084	ENSDARG00000020956	PCK2	phosphoenolpyruvate carboxykinase 2 (mitochondrial) [Source:ZFIN;Acc:ZDB-GENE-040426-2266]	725	258.333	-2.80645	0.0094072
ENSDART00000147582.2	ENSDART00000147582	ENSDARG00000025595	AGMO	alkylglycerol monooxygenase [Source:ZFIN;Acc:ZDB-GENE-040426-2207]	197	69.3333	-2.84135	0.0256438
ENSDART00000160053.1	ENSDART00000160053	ENSDARG00000104290	RIPK2	receptor-interacting serine-threonine kinase 2 [Source:ZFIN;Acc:ZDB-GENE-030902-3]	37.3333	13	-2.87179	0.0289564
ENSDART00000172890.1	ENSDART00000172890	ENSDARG00000105494	SI:CH211-113D11.8	si:ch211-113d11.8 [Source:ZFIN;Acc:ZDB-GENE-160113-48]	138	48	-2.875	0.0185711
ENSDART00000125109.2	ENSDART00000125109	ENSDARG00000088168	ABLIM3	actin binding LIM protein family, member 3 [Source:ZFIN;Acc:ZDB-GENE-070112-1122]	31.6667	11	-2.87879	0.0444054
ENSDART00000151370.1	ENSDART00000151370	ENSDARG00000086746	PRODHA	proline dehydrogenase (oxidase) 1a [Source:ZFIN;Acc:ZDB-GENE-041008-73]	57.6667	20	-2.88333	0.0135743
ENSDART00000133522.2	ENSDART00000133522	ENSDARG00000056691	CPEB4A	cytoplasmic polyadenylation element binding protein 4a [Source:ZFIN;Acc:ZDB-GENE-040426-1557]	80	27.6667	-2.89157	0.0177665
ENSDART00000125174.3	ENSDART00000125174	ENSDARG00000029766	NR1I2	nuclear receptor subfamily 1, group I, member 2 [Source:ZFIN;Acc:ZDB-GENE-030903-3]	35.6667	12.3333	-2.89189	0.0210419
ENSDART00000111531.3	ENSDART00000111531	ENSDARG00000076386	EPDL1	ependymin-like 1 [Source:ZFIN;Acc:ZDB-GENE-090710-3]	1073	370.333	-2.89739	0.015814
ENSDART00000124868.3	ENSDART00000124868	ENSDARG00000087697	LPL	lipoprotein lipase [Source:ZFIN;Acc:ZDB-GENE-990415-139]	431.333	146.333	-2.94761	0.0151195
ENSDART00000153454.1	ENSDART00000153454	ENSDARG00000061020	CCDC186	si:ch211-225b10.4 [Source:ZFIN;Acc:ZDB-GENE-100318-3]	26.6667	9	-2.96296	0.0476559
ENSDART00000170190.1	ENSDART00000170190	ENSDARG00000102503	N/A	N/A	68.3333	23	-2.97101	0.00130144
ENSDART00000151758.1	ENSDART00000151758	ENSDARG00000071015	PBXIP1A	pre-B-cell leukemia homeobox interacting protein 1a [Source:ZFIN;Acc:ZDB-GENE-060503-871]	22	7.33333	-3	0.0470236
ENSDART00000140042.1	ENSDART00000140042	ENSDARG00000020621	AP1B1	adaptor-related protein complex 1, beta 1 subunit [Source:ZFIN;Acc:ZDB-GENE-061025-1]	49.3333	16.3333	-3.02041	0.0176752
ENSDART00000134817.1	ENSDART00000134817	ENSDARG00000054632	FLI1A	Fli-1 proto-oncogene, ETS transcription factor a [Source:ZFIN;Acc:ZDB-GENE-980526-426]	31.3333	10.3333	-3.03226	0.0481389
ENSDART00000162937.1	ENSDART00000162937	ENSDARG00000020944	EZRA	ezrin a [Source:ZFIN;Acc:ZDB-GENE-050522-18]	59.6667	19.6667	-3.0339	0.0241994
ENSDART00000079689.6	ENSDART00000079689	ENSDARG00000030012	LRRFIP1A	leucine rich repeat (in FLII) interacting protein 1a [Source:ZFIN;Acc:ZDB-GENE-030131-99]	83	27.3333	-3.03659	0.00178602
ENSDART00000162362.1	ENSDART00000162362	ENSDARG00000100952	WU:FJ16A03	wu:fj16a03 [Source:ZFIN;Acc:ZDB-GENE-030131-7415]	3778.33	1243.33	-3.03887	0.0141558
ENSDART00000166114.1	ENSDART00000166114	ENSDARG00000042210	SEMA3AB	sema domain, immunoglobulin domain (Ig), short basic domain, secreted, (semaphorin) 3Ab [Source:ZFIN;Acc:ZDB-GENE-991209-6]	113.667	37.3333	-3.04464	0.0336572
ENSDART00000131660.1	ENSDART00000131660	ENSDARG00000068369	ANGPTL2B	angiopoietin-like 2b [Source:ZFIN;Acc:ZDB-GENE-050624-1]	225.667	74	-3.04955	0.00223176
ENSDART00000172461.1	ENSDART00000172461	ENSDARG00000100719	URAHA	urate (5-hydroxyiso-) hydrolase a [Source:ZFIN;Acc:ZDB-GENE-060825-253]	237	76.6667	-3.0913	0.0166039
ENSDART00000165655.1	ENSDART00000165655	ENSDARG00000078066	ELK1	ELK1, member of ETS oncogene family [Source:ZFIN;Acc:ZDB-GENE-090529-5]	119	38.3333	-3.10435	0.0198323
ENSDART00000144768.3	ENSDART00000144768	ENSDARG00000053119	SMPDL3A	sphingomyelin phosphodiesterase, acid-like 3A [Source:ZFIN;Acc:ZDB-GENE-050327-61]	29	9.33333	-3.10714	0.0183016
ENSDART00000165663.1	ENSDART00000165663	ENSDARG00000044281	ERBB2IP	erbb2 interacting protein [Source:ZFIN;Acc:ZDB-GENE-061103-403]	55.3333	17.6667	-3.13208	0.0435474
ENSDART00000164642.1	ENSDART00000164642	ENSDARG00000079486	FAM20A	family with sequence similarity 20, member A [Source:ZFIN;Acc:ZDB-GENE-081022-117]	197.667	63	-3.13757	0.0238422
ENSDART00000078939.6	ENSDART00000078939	ENSDARG00000056439	MARCH4	membrane-associated ring finger (C3HC4) 4 [Source:ZFIN;Acc:ZDB-GENE-041210-304]	20	6.33333	-3.15789	0.0496174
ENSDART00000165571.1	ENSDART00000165571	ENSDARG00000104631	RNF14	ring finger protein 14 [Source:HGNC Symbol;Acc:HGNC:10058]	98	31	-3.16129	0.0122104
ENSDART00000074683.5	ENSDART00000074683	ENSDARG00000052766	EVI5L	ecotropic viral integration site 5 like [Source:HGNC Symbol;Acc:HGNC:30464]	86	27	-3.18519	0.00105815
ENSDART00000146376.1	ENSDART00000146376	ENSDARG00000007127	ACAT2	acetyl-CoA acetyltransferase 2 [Source:ZFIN;Acc:ZDB-GENE-990714-22]	97	30.3333	-3.1978	0.0244085
ENSDART00000170774.1	ENSDART00000170774	ENSDARG00000101637	CCND1	cyclin D1 [Source:ZFIN;Acc:ZDB-GENE-980526-176]	20.3333	6.33333	-3.21053	0.0440551
ENSDART00000130640.2	ENSDART00000130640	ENSDARG00000087099	SI:CH73-106K19.5	si:ch73-106k19.5 [Source:ZFIN;Acc:ZDB-GENE-030131-1230]	1511	468.333	-3.22633	0.00393282
ENSDART00000039950.5	ENSDART00000039950	ENSDARG00000031848	PPARG	peroxisome proliferator-activated receptor gamma [Source:ZFIN;Acc:ZDB-GENE-990415-213]	109	33.6667	-3.23762	0.017121
ENSDART00000005740.10	ENSDART00000005740	ENSDARG00000031756	MEF2AA	myocyte enhancer factor 2aa [Source:ZFIN;Acc:ZDB-GENE-990415-163]	21.6667	6.66667	-3.25	0.0471424
ENSDART00000131669.1	ENSDART00000131669	ENSDARG00000075821	PLXNB1A	plexin b1a [Source:ZFIN;Acc:ZDB-GENE-050302-63]	47.6667	14.6667	-3.25	0.0395099
ENSDART00000104317.4	ENSDART00000104317	ENSDARG00000043821	KLF7B	Kruppel-like factor 7b [Source:ZFIN;Acc:ZDB-GENE-041014-171]	55.3333	17	-3.2549	0.0369836
ENSDART00000166909.1	ENSDART00000166909	ENSDARG00000099583	CABZ01034082.1	N/A	29.3333	9	-3.25926	0.0471655
ENSDART00000163591.1	ENSDART00000163591	ENSDARG00000028012	TPMT.2	thiopurine S-methyltransferase, tandem duplicate 2 [Source:ZFIN;Acc:ZDB-GENE-041010-177]	69.6667	21.3333	-3.26562	0.0288067
ENSDART00000138662.1	ENSDART00000138662	ENSDARG00000003615	SLC26A3.2	solute carrier family 26 (anion exchanger), member 3, tandem duplicate 2 [Source:ZFIN;Acc:ZDB-GENE-041210-179]	36	11	-3.27273	0.0168326
ENSDART00000149287.2	ENSDART00000149287	ENSDARG00000040303	NBN	nibrin [Source:ZFIN;Acc:ZDB-GENE-041008-35]	51.3333	15.3333	-3.34783	0.0186662
ENSDART00000137366.2	ENSDART00000137366	ENSDARG00000074219	MAP3K20	mitogen-activated protein kinase kinase kinase 20 [Source:ZFIN;Acc:ZDB-GENE-070928-11]	37.3333	11	-3.39394	0.0149109
ENSDART00000109131.3	ENSDART00000109131	ENSDARG00000076381	SLC25A1B	slc25a1 solute carrier family 25 (mitochondrial carrier; citrate transporter), member 1b [Source:ZFIN;Acc:ZDB-GENE-130114-1]	96.3333	27.6667	-3.48193	0.000336715
ENSDART00000046297.6	ENSDART00000046297	ENSDARG00000029476	LDLRA	low density lipoprotein receptor a [Source:ZFIN;Acc:ZDB-GENE-031217-1]	114.333	31.6667	-3.61053	0.0089723
ENSDART00000054879.5	ENSDART00000054879	ENSDARG00000037679	N/A	N/A	135	37.3333	-3.61607	0.0201409
ENSDART00000165969.1	ENSDART00000165969	ENSDARG00000086739	SLC17A3	si:ch1073-513e17.1 [Source:ZFIN;Acc:ZDB-GENE-030131-7188]	34.6667	9.33333	-3.71429	0.0155093
ENSDART00000147941.2	ENSDART00000147941	ENSDARG00000053215	ME1	malic enzyme 1, NADP(+)-dependent, cytosolic [Source:ZFIN;Acc:ZDB-GENE-061013-438]	234.667	61.6667	-3.80541	0.0194822
ENSDART00000132253.2	ENSDART00000132253	ENSDARG00000026988	TBC1D22B	TBC1 domain family, member 22B [Source:ZFIN;Acc:ZDB-GENE-091118-28]	39.3333	10.3333	-3.80645	0.0253612
ENSDART00000144884.1	ENSDART00000144884	ENSDARG00000020509	SRD5A1	steroid-5-alpha-reductase, alpha polypeptide 1 (3-oxo-5 alpha-steroid delta 4-dehydrogenase alpha 1) [Source:ZFIN;Acc:ZDB-GENE-060929-938]	28	7.33333	-3.81818	0.033554
ENSDART00000142813.1	ENSDART00000142813	ENSDARG00000062519	ABCC13	ATP-binding cassette, sub-family C (CFTR/MRP), member 13 [Source:ZFIN;Acc:ZDB-GENE-050517-26]	23	6	-3.83333	0.0272138
ENSDART00000168596.1	ENSDART00000168596	ENSDARG00000099437	SI:CH1073-268J14.1	si:ch1073-268j14.1 [Source:ZFIN;Acc:ZDB-GENE-141216-172]	31	8	-3.875	0.012105
ENSDART00000083582.5	ENSDART00000083582	ENSDARG00000059824	SOAT2	sterol O-acyltransferase 2 [Source:ZFIN;Acc:ZDB-GENE-061013-742]	45	11.3333	-3.97059	0.0460558
ENSDART00000083731.4	ENSDART00000083731	ENSDARG00000059883	TRPV1	transient receptor potential cation channel, subfamily V, member 1 [Source:ZFIN;Acc:ZDB-GENE-030912-8]	16	4	-4	0.0463663
ENSDART00000130090.2	ENSDART00000130090	ENSDARG00000070343	HOXC6A	homeobox C6a [Source:ZFIN;Acc:ZDB-GENE-990415-113]	17.3333	4.33333	-4	0.0354148
ENSDART00000147006.2	ENSDART00000147006	ENSDARG00000022372	KNG1	kininogen 1 [Source:ZFIN;Acc:ZDB-GENE-041010-56]	242.333	59.6667	-4.06145	0.0125992
ENSDART00000158017.1	ENSDART00000158017	ENSDARG00000100747	N/A	N/A	20.3333	5	-4.06667	0.0237994
ENSDART00000103754.5	ENSDART00000103754	ENSDARG00000006526	FN1B	fibronectin 1b [Source:ZFIN;Acc:ZDB-GENE-030131-6545]	108	26.3333	-4.10127	0.00240456
ENSDART00000090930.5	ENSDART00000090930	ENSDARG00000062699	NKAIN4	sodium/potassium transporting ATPase interacting 4 [Source:ZFIN;Acc:ZDB-GENE-080204-60]	27.6667	6.33333	-4.36842	0.00857965
ENSDART00000132220.2	ENSDART00000132220	ENSDARG00000099721	ZNF1002	zinc finger protein 1002 [Source:ZFIN;Acc:ZDB-GENE-050208-383]	14.6667	3.33333	-4.4	0.0487269
ENSDART00000167844.1	ENSDART00000167844	ENSDARG00000100947	MAFK	v-maf avian musculoaponeurotic fibrosarcoma oncogene homolog K [Source:ZFIN;Acc:ZDB-GENE-040624-9]	43.6667	9.66667	-4.51724	0.00333537
ENSDART00000099895.5	ENSDART00000099895	ENSDARG00000061551	RAP1GAP2A	RAP1 GTPase activating protein 2a [Source:ZFIN;Acc:ZDB-GENE-061013-179]	16.6667	3.66667	-4.54545	0.0201458
ENSDART00000109379.2	ENSDART00000109379	ENSDARG00000077938	CD248B	CD248 molecule, endosialin b [Source:ZFIN;Acc:ZDB-GENE-050309-46]	12.3333	2.66667	-4.625	0.0424294
ENSDART00000148761.1	ENSDART00000148761	ENSDARG00000095843	COL24A1	collagen type XXIV alpha 1 [Source:ZFIN;Acc:ZDB-GENE-110411-128]	58.6667	12.6667	-4.63158	0.013737
ENSDART00000166470.1	ENSDART00000166470	ENSDARG00000105029	TPPP	tubulin polymerization promoting protein [Source:HGNC Symbol;Acc:HGNC:24164]	23.3333	5	-4.66667	0.011017
ENSDART00000170671.1	ENSDART00000170671	ENSDARG00000103934	MEGF8	multiple EGF-like-domains 8 [Source:ZFIN;Acc:ZDB-GENE-090730-1]	27.3333	5.66667	-4.82353	0.0279464
ENSDART00000164361.1	ENSDART00000164361	ENSDARG00000104022	GCGRA	glucagon receptor a [Source:ZFIN;Acc:ZDB-GENE-050516-1]	65.3333	13.3333	-4.9	0.0249037
ENSDART00000030938.8	ENSDART00000030938	ENSDARG00000028725	ADRA1AA	adrenoceptor alpha 1Aa [Source:ZFIN;Acc:ZDB-GENE-030131-2831]	19.6667	4	-4.91667	0.0190349
ENSDART00000059939.5	ENSDART00000059939	ENSDARG00000040898	GPA33	glycoprotein A33 (transmembrane) [Source:ZFIN;Acc:ZDB-GENE-070912-194]	23.3333	4.66667	-5	0.0285355
ENSDART00000133007.1	ENSDART00000133007	ENSDARG00000019541	GPT2L	glutamic pyruvate transaminase (alanine aminotransferase) 2, like [Source:ZFIN;Acc:ZDB-GENE-050302-11]	57	11.3333	-5.02941	0.0175744
ENSDART00000020167.10	ENSDART00000020167	ENSDARG00000013926	SLC16A9A	solute carrier family 16, member 9a [Source:ZFIN;Acc:ZDB-GENE-040426-1364]	28.6667	5.66667	-5.05882	0.0208533
ENSDART00000080269.3	ENSDART00000080269	ENSDARG00000057571	PGAM2	phosphoglycerate mutase 2 (muscle) [Source:ZFIN;Acc:ZDB-GENE-040116-6]	19	3.66667	-5.18182	0.0158606
ENSDART00000140004.2	ENSDART00000140004	ENSDARG00000044365	ANGPTL3	angiopoietin-like 3 [Source:ZFIN;Acc:ZDB-GENE-010817-3]	19.6667	3.66667	-5.36364	0.00576812
ENSDART00000148809.2	ENSDART00000148809	ENSDARG00000069245	MATN3A	matrilin 3a [Source:ZFIN;Acc:ZDB-GENE-040822-21]	11	2	-5.5	0.0426039
ENSDART00000172766.1	ENSDART00000172766	ENSDARG00000104820	PSD3L	pleckstrin and Sec7 domain containing 3, like [Source:ZFIN;Acc:ZDB-GENE-030131-8195]	20.6667	3.66667	-5.63636	0.0241957
ENSDART00000154552.2	ENSDART00000154552	ENSDARG00000098024	SI:DKEY-262K9.2	si:dkey-262k9.2 [Source:ZFIN;Acc:ZDB-GENE-131121-282]	15.6667	2.66667	-5.875	0.0209407
ENSDART00000135142.1	ENSDART00000135142	ENSDARG00000061672	SI:CH73-334D15.1	si:ch73-334d15.1 [Source:ZFIN;Acc:ZDB-GENE-091118-35]	23	3.66667	-6.27273	0.00920822
ENSDART00000066805.5	ENSDART00000066805	ENSDARG00000045427	SI:DKEY-96N2.3	si:dkey-96n2.3 [Source:ZFIN;Acc:ZDB-GENE-091204-118]	25.3333	4	-6.33333	0.00302729
ENSDART00000161844.1	ENSDART00000161844	ENSDARG00000102138	FOXA1	forkhead box A1 [Source:ZFIN;Acc:ZDB-GENE-990415-78]	33.3333	5	-6.66667	0.0405804
ENSDART00000140253.1	ENSDART00000140253	ENSDARG00000074244	ARHGEF10LB	Rho guanine nucleotide exchange factor (GEF) 10-like b [Source:ZFIN;Acc:ZDB-GENE-090313-222]	15.6667	2.33333	-6.71429	0.0478231
ENSDART00000160955.2	ENSDART00000160955	ENSDARG00000091061	SLC38A3B	solute carrier family 38, member 3b [Source:ZFIN;Acc:ZDB-GENE-121120-3]	173.667	24.3333	-7.13699	0.00522651
ENSDART00000163194.1	ENSDART00000163194	ENSDARG00000016771	TFA	transferrin-a [Source:ZFIN;Acc:ZDB-GENE-980526-35]	4626.33	647.667	-7.14308	0.0297311
ENSDART00000149414.1	ENSDART00000149414	ENSDARG00000038153	LGALS2B	lectin, galactoside-binding, soluble, 2b [Source:ZFIN;Acc:ZDB-GENE-040426-1590]	43.3333	6	-7.22222	0.0413886
ENSDART00000159835.1	ENSDART00000159835	ENSDARG00000102894	CABZ01057159.1	N/A	55.3333	7	-7.90476	0.0113362
ENSDART00000144227.1	ENSDART00000144227	ENSDARG00000039429	ADKA	adenosine kinase a [Source:ZFIN;Acc:ZDB-GENE-030425-3]	17.3333	2	-8.66667	0.00890115
ENSDART00000157456.1	ENSDART00000157456	ENSDARG00000100203	CABZ01056637.1	N/A	22	2.33333	-9.42857	0.0486807
ENSDART00000144138.2	ENSDART00000144138	ENSDARG00000006615	HNF1BA	HNF1 homeobox Ba [Source:ZFIN;Acc:ZDB-GENE-020104-1]	33.3333	3	-11.1111	0.0001957
ENSDART00000034619.6	ENSDART00000034619	ENSDARG00000056757	SLC39A8	solute carrier family 39 (zinc transporter), member 8 [Source:ZFIN;Acc:ZDB-GENE-050419-124]	45.6667	3.33333	-13.7	0.0098234
ENSDART00000171634.1	ENSDART00000171634	ENSDARG00000099227	GALNT13	UDP-N-acetyl-alpha-D-galactosamine:polypeptide N-acetylgalactosaminyltransferase 13 [Source:ZFIN;Acc:ZDB-GENE-091204-444]	10.6667	0.666667	-16	0.0357312
